1 **Evolutionarily Conserved Alternative Splicing**

2 **Across Monocots**

3 **Wenbin Mei\***, **Lucas Boatwright\***, **Guanqiao Feng†**, **James C. Schnable‡**, **W.**

4 **Brad Barbazuk\***, §,\*\*

5 \*Department of Biology, University of Florida, Gainesville, USA

6 †Graduate Program in Plant Molecular and Cellular Biology, University of Florida,

7 Gainesville, FL, USA

8 ‡Agronomy & Horticulture, University of Nebraska–Lincoln, Beadle Center E207,

9 Lincoln, Nebraska, USA

10 §Genetics Institute, University of Florida, Gainesville, USA

11 **Running title: Evolutionarily conserved alternative splicing**

12 **Keywords:** conserved alternative splicing events, monocot, grass family, RS and

13 RS2Z subfamilies, R2R3-MYB

14 **\*\* Correspondence author:** W. Brad Barbazuk

15 Address: Department of Biology, University of Florida, Gainesville, USA

16 Telephone: 1(352) 273-8624

17 Email: bbarbazuk@ufl.edu

## 18 **Abstract**

19           One difficulty when identifying and analyzing alternative splicing (AS)  
20 events in plants is distinguishing functional AS from splicing noise. One way to  
21 add confidence to the validity of a splice isoform is to observe that it is conserved  
22 across evolutionarily related species. We use a high throughput method to  
23 identify junction based conserved AS events from RNA-Seq data across nine  
24 plant species including: five grass monocots (maize, sorghum, rice, *Brachypodium*  
25 and foxtail millet), plus two non-grass monocots (banana and African oil palm),  
26 the eudicot *Arabidopsis* and the basal angiosperm *Amborella*. In total, 9,804  
27 conserved AS events within 19,235 genes were identified conserved between 2  
28 or more species studied. In grasses containing large regions of conserved  
29 synteny, the frequency of conserved AS events is twice that observed for genes  
30 outside of conserved synteny blocks. In plant-specific RS and RS2Z subfamilies,  
31 we observe both conservation and divergence of AS events after the whole  
32 genome duplication in maize. In addition, plant-specific RS and RS2Z subfamilies  
33 are highly connected with R2R3-MYB in splicing networks. Furthermore, we  
34 discovered that the network based on genes harboring conserved AS events is  
35 enriched for phosphatases, kinases and ubiquitylation genes, which suggests that  
36 AS may participate in regulating signaling pathways. These data lay the  
37 foundation for identifying and studying conserved AS events in the monocots,  
38 particularly across grass species, and this conserved AS resource identifies an  
39 additional layer between genotype to phenotype that may impact future crop  
40 improvement efforts.

## 41 **Introduction**

42           Alternative splicing (AS) is an important post-transcriptional process that  
43 can produce two or more transcript isoforms from a pre-mRNA. AS occurs in the  
44 spliceosome by removing introns and joining exons through the selective use of  
45 splice sites (Lee and Rio 2015) and is governed by *cis*- regulatory elements such  
46 as splicing enhancers/silencers, and *trans*- regulatory elements including SR  
47 proteins and hnRNP proteins (Busch and Hertel 2012, Wang and Burge 2008,  
48 Reddy et al. 2012, Reddy et al. 2013). AS isoforms that are translated can  
49 influence proteome diversity, while others that are not translated are  
50 purposefully non-functional and can act to post-transcriptionally modulate gene  
51 product levels (Fu et al. 2009, Hammond, Wachter, and Breaker 2009). AS  
52 participates in many important processes during the lifecycle of plants (Staiger  
53 and Brown 2013) and AS occurs in response to many abiotic stresses  
54 (Mastrangelo et al. 2012), for example red/blue light (Shikata et al. 2014, Wu et  
55 al. 2014), salt stress (Feng et al. 2015), drought (Thatcher et al. 2016), flooding  
56 (Syed et al. 2015) and temperature (Streitner et al. 2013, James et al. 2012).

57           RNA-Seq has become a standard tool to investigate transcriptomes and AS  
58 isoforms. While many studies have identified AS in individual species (Li, Xiao,  
59 and Zhu 2014, Thatcher et al. 2014, Shen et al. 2014, Filichkin et al. 2010,  
60 Mandadi and Scholthof 2015), few report investigating conserved AS across  
61 multiple plant genomes. Most published studies have focused on identifying  
62 conserved AS events between only two species. For example Severing et al.  
63 (2009) identified 56 protein-coding, conserved AS events between *Arabidopsis*  
64 and rice orthologous gene sets, and 30 conserved AS events leading to non-  
65 functional isoforms subjected to nonsense-mediated decay. Similarly, another  
66 study detected 537 AS events conserved between *Arabidopsis* and *Brassica*

67 (Darracq and Adams 2013) and 71 conserved AS events were identified between  
68 *Populus* and *Eucalyptus* (Xu et al. 2014). With respect to comparing more than  
69 two species, one study found 16 AS transcripts conserved between  
70 *Brachypodium*, rice, and *Arabidopsis* by performing all-vs-all BLAST between EST  
71 sequences (Walters et al. 2013). Recently, discovery and identification of AS  
72 events conserved broadly across eudicots has been reported (Chamala et al.  
73 2015). Chuang et al. (2015) used available Sanger EST sets to characterize AS in  
74 grass species but did not focus on conserved AS events. There are no  
75 corresponding multi-species studies that leverage the deep NGS resources to  
76 characterize and identify conserved AS events within monocots and the grass  
77 family.

78         Many monocot species are economically important and grass species  
79 (Poaceae) are a particularly important source of calories. Within the grass family  
80 there are two major clades. The BEP clade is made up of the Bambusoideae,  
81 Ehrhartoideae, and Pooideae and contains rice and *Brachypodium* (Zhao et al.  
82 2013); the PACMAD clade includes Panicoideae, Arundinoideae, Chloridoideae,  
83 Micrairoideae, Aristidoideae, and Danthonioideae, and includes maize, sorghum  
84 and foxtail millet (Cotton et al. 2015). In addition to these two major clades,  
85 there are three clades of basal grasses lineage Anomochlooideae, Pharoideae,  
86 and Puelioideae (Cotton et al. 2015). Published whole genome sequences exist  
87 for many monocot species including the grass species maize (Schnable et al.  
88 2009), sorghum (Paterson et al. 2009), rice (Goff et al. 2002), *Brachypodium*  
89 (Vogel et al. 2010) and foxtail millet (Bennetzen et al. 2012), the non-grass  
90 species banana (D'Hont et al. 2012) and African oil palm (Singh et al. 2013).

91           To characterize AS and identify conserved events due to species shared  
92    ancestral a computational method was employed that identifies high confidence  
93    isoforms in any species with RNA-Seq data and a reference genome sequence,  
94    and then uses a junction based approach to identify conserved AS events across  
95    multiple species. In this analysis, we focused on seven monocot species that have  
96    available reference genome sequences and deep RNA-Seq data sets. Five of these  
97    are grasses (maize, rice, sorghum, foxtail millet and *Brachypodium*) that also  
98    have substantial retained gene collinearity which eases the identification of  
99    synteny and aids orthologue calls (Schnable, Freeling, and Lyons 2012). This  
100   analysis also includes banana and African palm oil, which extends the discovery  
101   of conserved events into non-grass monocot species. Although there are other  
102   non-grass monocot species that have available reference genomes, such as  
103   duckweed and orchid, there was not sufficient RNA-Seq data available for these  
104   species to be included in this analysis. Likewise, species representing basal grass  
105   lineages were excluded due to lack of reference genome sequences. Finally, the  
106   eudicot *Arabidopsis thaliana* and the basal angiosperm *Amborella* were included  
107   to provide outgroups for comparison. Therefore, the species studied allowed us  
108   to identify conserved AS events at specific reference points across the grasses  
109   and extends into non-grass monocots, eudicots and the sister species to all  
110   angiosperms.

111           Examination of conserved events uncovers likely functionally important  
112   AS isoforms of SR protein genes, stress-response transcription factors, and  
113   members of known protein-protein interaction networks. In addition the  
114   conserved AS event collection provides an opportunity to test the functional  
115   sharing hypothesis (Su et al. 2006) between single-copy vs. non-single-copy

116 genes, something that was not examined in previous studies of conserved AS  
117 events. This hypothesis predicts more instances of conserved alternative splicing  
118 events will be found in single copy genes than in non-single-copy genes. To  
119 measure to extent of selection pressure on AS, we examined Ka/Ks values on  
120 exons that flank conserved AS events. We also present network analysis based  
121 on the *Arabidopsis* protein-protein interaction data that provides evidence for a  
122 close association between splicing factors and stress responsive transcription  
123 factors that undergo conserved AS, and between splicing factors and R2R3-MYB  
124 across species. Finally, we discuss several noteworthy cases of conserved AS  
125 events across angiosperms including SPA3 possessing a conserved alternative  
126 donor site, a KH RNA-binding domain containing protein with a widely  
127 conserved exon skipping event, and the stress response NAC transcription factor  
128 RD26 that harbors an intron retention event conserved across the angiosperms.

## 129 **Materials and Methods**

### 130 ***Genome Assemblies and Annotations***

131 All analyses were performed on publicly available sequence and  
132 annotation collections for the following species: foxtail millet (*Setaria italica*),  
133 rice (*Oryza sativa L. ssp. Japonica*), *Brachypodium* (*Brachypodium distachyon*), the  
134 non-grass monocots banana (*Musa acuminata*) and African oil palm (*Elaeis*  
135 *guineensis*), the eudicot *Arabidopsis thaliana* and the basal angiosperm *Amborella*  
136 (*Amborella trichopoda*), which is a sister taxon to all angiosperms.

137 The Maize RefGen\_v2 genome sequence and working gene set annotation  
138 were retrieved from MaizeGDB (Lawrence et al. 2004). Reference genome  
139 sequence and gene annotation for oil palm were retrieved from the Malaysian

140 Palm Oil Board (genomsawit.mpob.gov.my). Reference genome and annotation  
141 for Banana were retrieved from the banana genome hub (Droc et al. 2013). All  
142 remaining reference genome assemblies and annotations were retrieved from  
143 Phytozome v10 (Goodstein et al. 2012) (Table S1).

#### 144 ***Transcriptome Data Collection***

145 AS in maize (*Zea mays*) and sorghum (*Sorghum bicolor*) was previously  
146 identified based on public RNA-Seq data and described in (Mei et al. In Review),  
147 and available from figshare (<http://10.6084/m9.figshare.4205079>). Transcript  
148 sequences and annotations of *Arabidopsis thaliana* were retrieved from  
149 Araport11 PreRelease 20151202 (Cheng et al. 2016), which presents the  
150 updated TAIR10 annotation by inclusion of 113 RNA-Seq data sets. For the  
151 remaining 6 species, Illumina RNA-Seq, 454 and Sanger EST transcript sequences  
152 were downloaded from NCBI GeneBank. The sequence collections are described  
153 in Table S2.

#### 154 ***Method to Detect Alternative Splicing***

155 The process and software parameters used to assemble transcripts from  
156 Illumina short reads was described in full details (Mei et al. In Review). Briefly,  
157 three approaches were taken to assemble transcripts from Illumina short reads  
158 to maximize isoform detection. The assembly software used was annotation  
159 guided Cufflinks 2.2.1 (Trapnell et al. 2012), genome-guided Trinity 2.0.4  
160 (Grabherr et al. 2011) and annotation guided StringTie 1.0.0 (Pertea et al. 2015).  
161 Isoforms built from cufflinks were required to have minimal expression FPKM  
162 value of 0.1 and required full reads support for the whole isoforms.

163 We masked vector and contaminant sequence in the Sanger ESTs using  
164 SeqClean (<http://seqclean.sourceforge.net/>). 454 transcripts were constructed  
165 using Newbler v2.8 (Roche 2010) with parameters “-cdna -urt”. Cufflinks, Trinity  
166 and StringTie assembled isoforms were merged with the Newbler 454  
167 assemblies and the cleaned ESTs. Each species specific sequence collection was  
168 aligned back to the appropriate reference genome sequence followed by  
169 additional assembly and clustering to remove redundancy using the PASA 2.0  
170 package (Haas et al. 2003). Isoform quality control steps described in Mei et al.  
171 (In Review) were used on the PASA outputted transcript set to remove isoforms  
172 that were poorly supported and/or potentially poor quality/poorly assembled.  
173 Briefly, each splice junction in a final retained isoform was required to have a  
174 minimum entropy score of 2 (Sturgill et al. 2013). Retained introns that define  
175 potential intron-retention isoforms were expected over a minimum of 90% of  
176 their length with a minimal median coverage depth of 10, and a minimum intron  
177 retention isoform ratio of 10%. The intron retention rate was calculated as  
178 described in Marquez et al. (2012), where the median coverage of the retained  
179 intron was divided by the number of reads supporting the splice junction. Lastly,  
180 we required each isoform to have a minimum FPKM of 1 and compose at least  
181 5% of the total isoform abundance for that gene in at least one tissue examined.

182 We performed the above methods to identify and define AS events in rice,  
183 foxtail millet, *Brachypodium*, banana, African oil palm, and *Amborella*. The  
184 transcripts from Araport11 PreRelease 20151202 for *Arabidopsis* were realigned  
185 to the *Arabidopsis* reference genome using PASA to identify and characterize the  
186 set of *Arabidopsis* AS events. AS isoforms defined previously within maize and



187 sorghum Mei et al. (In Review) were used to complete the AS isoforms sets  
188 analyzed in this study.

### 189 ***Orthofinder Clustering Across Nine Species***

190 Orthologous sequences were defined and grouped in Orthogroups across  
191 the nine species by OrthoFinder with default setting (Emms and Kelly 2015).  
192 OrthoFinder was designed for plant genome orthogroup identification and  
193 accounts for gene length bias.

### 194 ***Identify Sets of Syntenic Genes Across Five Grass Species***

195 Syntenic orthologs across five grass species (*Zea mays*, *Sorghum bicolor*,  
196 *Setaria italica*, *Oryza sativa*, *Brachypodium distachyon*) were defined using the  
197 methodology employed by (Schnable, Freeling, and Lyons 2012). Gene models  
198 were updated according to new annotations from Phytozome 10 (Goodstein et al.  
199 2012). 11,995 syntenic gene lists across five species (sorghum, rice, foxtail millet,  
200 *Brachypodium*, either maize1/maize2 or both) were used for downstream  
201 analysis.

### 202 ***Identification of Conserved Alternative Splicing***

203 AS was independently identified in each species (see above) and all AS  
204 isoform sequences of the same event type (intron retention, exon skipping etc.)  
205 for a given species were pooled. The computational methodology to detect  
206 conserved AS relies on the creation of splice anchor sequence tags (SAST) for  
207 each AS event and then comparing the SASTs for a given event type with the  
208 SASTs defining the same event type between species. SASTs were generated for

209 each AS event by extracting up to 300bp of sequence from both sides of the  
210 splice junction that defines the AS event types described in Figure 1. The tags  
211 from a particular AS event (i.e. exon skipping SASTs) from each species were  
212 compared to one another using tBLASTx from WU-BLAST (Gish, W. (1996-2003)  
213 <http://blast.wustl.edu>) with an E-value cutoff of 1e-5. If the length of two  
214 matching tags were both less than 30bp, this matching was not considered. In  
215 the cases tags being compared were less than 100 bp, the default tBLASTx E-  
216 value cutoff value was used. To classify conserved AS, SASTs flanking a AS event  
217 splice junction are required to be conserved between genes across species, and  
218 those genes must belong to the same orthogroup. Conserved AS events identified  
219 by this process were clustered and each cluster may contain conserved AS events  
220 identified between orthologous genes across species (1:1) as well as between  
221 paralogs. In an ideal setting, one conserved AS cluster represents one ancient  
222 conserved AS event across multiple species. However, if a gene within sorghum  
223 is present in two copies (homeologues) in maize, and all three genes harbor a  
224 conserved AS event, all three events will be assigned to the same event cluster.  
225 Therefore, with respect to the gene in sorghum and the two homeologous copies  
226 in maize, this cluster identifies 1 conserved event defined by 2 homeologous  
227 events in maize and 1 event in sorghum. Therefore, the total number of events  
228 making up a cluster may be larger than the number of species harboring the  
229 event. Because we identify these individual events within each species as  
230 instances of a conserved event we generalize the AS event cluster as a  
231 “conserved AS event”.

### 232 ***Measure Selection Pressure on Alternative Splicing***

233 We looked for evidence of selection pressure on AS events that were  
234 conserved by examining the difference between pairwise non-synonymous  
235 substitution rates ( $K_a$ ) vs. synonymous substitution rates ( $K_s$ ) for residues  
236 defined by exon sequences flanking the conserved AS event in grass species.  
237 These are the same regions that were used to construct SASTs (Figure 1). Both  
238 upstream and downstream alignments required minimal alignment lengths of 40  
239 codons. Selection pressure on AS events at the amino acid levels was measured  
240 by determining the  $K_a/K_s$  ratios using KaKs\_Calculator2.0 through model  
241 averaging (Wang et al. 2010). To minimize errors introduced by alignments, or  
242 due to paralogs that may result when comparing loci across large phylogenetic  
243 distances, the  $K_a/K_s$  evaluation of conserved AS events was limited to those  
244 events originating within orthologous grass genome loci that also exhibit  
245 conserved synteny (defined above).

#### 246 ***Testing the Functional Sharing Hypothesis: Whether Single Copy Genes Have*** 247 ***More Conserved AS Events***

248 The functional sharing hypothesis predicts that conserved AS events  
249 would have a higher incidence in single copy genes compared to non-single copy  
250 genes. We used a set composed of 2,717 multi-exon genes identified as “strictly”  
251 and “mostly” single copy identified across 20 flowering plant genomes by De  
252 Smet et al. (2013). We compared the number of single-copy genes exhibiting  
253 conserved AS events to the number of non-single copy genes with conserved AS  
254 events.

#### 255 ***Conserved AS in SR and hnRNP Proteins***

256 Maize SR protein genes were retrieved from Rauch et al. (2014); Sorghum  
257 SR protein genes were retrieved from Richardson et al. (2011). Maize hnRNP  
258 protein encoding genes were retrieved from PlantGDB (Duvick et al. 2008). The  
259 primary protein sequences of each SR protein gene in maize and sorghum were  
260 used for phylogeny analysis. Protein sequences were aligned with MUSCLE  
261 (version 3.8.31) using default parameters (Edgar 2004). The alignments were  
262 used to construct a maximum likelihood phylogenetic tree with RAxML (version  
263 8.1.12) software using a gamma distribution and LG4X model (Stamatakis 2014,  
264 Le, Dang, and Gascuel 2012). A manual search along the phylogenetic tree was  
265 performed to determine conserved AS events in SR families between maize and  
266 sorghum based on conserved isoform structure. The exon-intron gene structure  
267 was visualized with Fancygene version 1.4 (Rambaldi and Ciccarelli  
268 2009) with AS events further labeled.

### 269 ***Network Analysis in Stress Responsive Transcription Factors and Conserved*** 270 ***Splicing Genes***

271 3,150 *Arabidopsis* transcription factors (TFs) responsive to 14 diverse  
272 stresses were retrieved from STIFDB V2.0 (Naika et al. 2013) and we were  
273 focused on five major stresses (ABA, drought, cold, NaCl and light). Protein-  
274 protein interaction networks based on transcription factors (TFs) in *Arabidopsis*  
275 with conserved AS in response to five major stresses were built with using  
276 STRING v10 (Szklarczyk et al. 2014). In addition, a network based on *Arabidopsis*  
277 genes demonstrating conserved AS in *Amborella*, *Arabidopsis* and at least one  
278 monocot species was also constructed. The cluster of networks constructed was  
279 identified and analyzed in Cytoscape v3.3.0 (Shannon et al. 2003).

280 **Go Term Annotation**

281 Genes harboring conserved AS events between *Amborella*, *Arabidopsis*,  
282 and at least one monocot species were further evaluated for functional  
283 annotation and GO term enrichment based on the *Arabidopsis* gene name using  
284 the agriGO analysis toolkit (Du et al. 2010). We use the Fisher's exact test in  
285 singular enrichment analysis, followed by multiple test corrections with the  
286 Hochberg FDR test. Only associations with a minimum corrected p-value of 0.05  
287 were considered.

288 **Data Availability**

289 AS events table and GFF files for the AS isoforms in seven species (*Setaria*  
290 *italica*, *Oryza sativa* L. ssp. *Japonica*, *Brachypodium distachyon*, *Musa acuminata*,  
291 and *Elaeis guineensis*, the eudicot *Arabidopsis thaliana* and the basal angiosperm  
292 *Amborella*) are made available to the community via figshare (figureshare  
293 address will made immediately available once the manuscript has been  
294 accepted). In addition, a table detailing the AS events identified as conserved  
295 during this study will be made available. The *Zea mays* and *Sorghum bicolor* are  
296 already available community via figshare  
297 (<http://10.6084/m9.figshare.4205079>).

298 **Results**

299 ***Up to 54.6% of Expressed Multi-Exon Genes Exhibit Evidence of AS Among***  
300 ***Nine Species***

301 Five types of AS events were considered during this study: Intron  
302 retention (IntronR), Alternative acceptor (AltA), Alternative donor (AltD), Exon  
303 skipping (ExonS) and Alternate terminal exon (AltTE) (Figure 1). The percentage  
304 of expressed multi-exon genes that exhibit AS was determined for each species.  
305 The nine species evaluated exhibit AS across a range of 28.7% to 54.6% of multi-  
306 exon genes (Table S3). The largest proportion of expressed multi-exon genes  
307 with evidence of AS was in *Amborella* (54.6%). Over 60% of the intron retention  
308 events in *Amborella* were removed during the filtering process (described in  
309 Materials and Methods). Although the number of *Amborella* genes that exhibit AS  
310 is similar to that of other species examined during this analysis, *Amborella* has a  
311 lower proportion of multi-exon genes in the genome relative to other species.  
312 Therefore, despite the similar number of multi-exon genes that undergo AS,  
313 *Amborella* exhibits a high fraction of multi-exon genes that produce AS  
314 transcripts compared to the other species considered here. Intriguingly,  
315 *Amborella* genes that undergo AS produce the highest average number of  
316 isoforms/gene compared to other species (Table S3). Whether this feature  
317 reflects the evolutionary position of *Amborella* in angiosperm, or is the result of  
318 the absence of lineage specific whole genome duplication events – whereas  
319 species with additional lineage specific WGD events have lost or partitioned AS  
320 isoforms among paralogues through sub-functionalization (Jiang et al. 2013) –  
321 remains to be investigated. Maize has the largest collection of RNA-Seq data  
322 among the nine species examined and also has the largest number of AS events,  
323 but the percentage of multi-exon genes that undergo AS is similar to other  
324 species. While the proportions of genes that undergo AS and the total number of  
325 AS events is higher than previously reported for many plant species (*Amborella*

326 Genome Project 2013, Campbell et al. 2006, Panahi et al. 2014, Abdel-Ghany et al.  
327 2016, Walters et al. 2013), a substantially lower fraction of plant multi-exon  
328 genes undergo AS relative to human genes where a reported 95% of multi-exon  
329 genes undergo AS (Pan et al. 2008). Similar to previous genome-wide AS studies  
330 (Thatcher et al. 2014, Li, Xiao, and Zhu 2014, Mandadi and Scholthof 2015,  
331 Chamala et al. 2015), intron retention was the most commonly observed AS  
332 event type in monocots. Sorghum and *Amborella* were found to have the lowest  
333 percentage of intron retention events, 35.6% and 37.2%, respectively, while  
334 African oil palm and *Brachypodium* have the highest proportion of intron  
335 retention events, 61.4% and 57.6%, respectively (Table S3).

### 336 ***AS Events Conserved Between Monocots, Arabidopsis and Amborella***

337 We identified 9,804 conserved AS event clusters in nine species (Table 1).  
338 59.0% of conserved AS events represent intron retention. Approximately 68.7%,  
339 18.6%, 7.3% and 5.4% conserved AS events are conserved across two species,  
340 three species, four species and at least five species, respectively (Table 1). 1,816  
341 conserved AS event clusters were found to include *Amborella*. Of these, 1,015  
342 involved conserved intron retention events, 450 alternative acceptor events, 205  
343 alternative donor events, 114 exon skipping events and 32 alternative terminal  
344 exon events (Table 2). In addition, we identified 80 conserved AS events  
345 conserved only between *Amborella* and *Arabidopsis* and absent from seven  
346 monocot species examined. These 80 AS events likely represent AS events lost  
347 after the divergence of eudicots and monocots including 34 intron retention, 31  
348 alternative acceptor, 11 alternative donor, and 4 exon skipping events (Table 2).  
349 Analysis of nine species revealed 9,804 conserved AS event belong to 19,235

350 genes (Figure 2), with an apparent increased number of genes with conserved AS  
351 events within grass species (Figure 2); *Arabidopsis* had the least (944) number of  
352 genes harboring conserved AS events while maize had the most (3,687).

353 GO term enrichment analysis was performed on *Arabidopsis* genes with  
354 AS events that are conserved within *Amborella*, *Arabidopsis* and monocots to  
355 identify whether genes with conserved AS events participated in particular  
356 biological processes. 129 AS events meet this criteria. These 129 conserved AS  
357 events represent 64 intron retention events, 43 alternative acceptor events, 11  
358 alternative donor events, 10 exon skipping events and 1 alternative terminal  
359 exon events (Table 2). GO term enrichment based on the *Arabidopsis* genes  
360 producing these 129 conserved AS events suggest an over-representation of  
361 kinase and phosphorylation activity (Figure S1). This result is consistent with  
362 the proposal that AS impacts protein kinase mediated signaling pathways  
363 (Reddy et al. 2013), which may modulate the transfer of developmental or  
364 environmental cues.

365 TFIIIA possesses an exon skipping event conserved across land plants (Fu  
366 et al. 2009, Barbazuk 2010). This event was also identified in all species  
367 examined in our study, although our stringent depth requirements initially  
368 filtered it out of the banana analysis. In addition, a widely conserved AS event  
369 was discovered within SPA3, a member of the SPA protein family, that plays a  
370 pivotal role in light signaling as a suppressor of photomorphogenesis (Laubinger  
371 and Hoecker 2003). Initial investigation by Shikata et al. (2014) identified an  
372 intron retention event and an alternative donor event within *Arabidopsis* SPA3;  
373 both splice isoforms harbor premature terminal codons that result in truncated  
374 protein products. These truncated proteins retain interaction with



375 CONSTITUTIVE PHOTOMORPHOGENIC 1 (COPI) but lose the ability to bind to  
376 DAMAGED DNA-BINDING PROTEIN 1 (DDB1). Evidence suggests the  
377 phytochrome could mediate the production of AS transcripts of SPA3 in response  
378 to some light conditions, thus promoting plant photomorphogenesis (Shikata et  
379 al. 2014). Both the intron retention and alternative donor AS events were  
380 identified in our analysis: the alternative donor event is conserved across all nine  
381 species examined and the intron retention event is conserved in four species:  
382 maize, foxtail millet, African oil palm and *Arabidopsis*. The absence of the intron  
383 retention event in the other species examined could be due to limited data depth  
384 or tissue sampling. Further investigation is required to determine whether or not  
385 this intron retention is conserved broadly across the angiosperms.

386         Alternative donor and acceptor events were reported to be significantly  
387 enriched among events conserved between *Brassica* and *Arabidopsis* (Darracq  
388 and Adams 2013). We found significant enrichment of alternative donor and  
389 alternative acceptor events conserved across at least three species relative to  
390 events conserved in only two species ( $P < 0.0001$ , Fisher's exact test, Table 1),  
391 similar enrichment patterns were observed for exon skipping events conserved  
392 across at least four species relative to clusters conserved in only two species  
393 ( $P < 0.05$ , Fisher's exact test, Table 1). Expectedly, the overall numbers of AS  
394 events that are conserved decreases as the number of species they are conserved  
395 within increases. In addition, when considering AS conserved across multiple  
396 species, as the number of species that harbor the conserved AS increase, the  
397 proportion of conserved AS that are intron retention decrease relative to the  
398 other event types. This suggests that requiring an AS event to be conserved  
399 between species selects for biologically relevant and important events, and that

400 the trend we observe with intron retention might imply that intron retention  
401 suffers a higher proportion of ‘noisy’ or non-relevant splicing relative to other AS  
402 types.

403         Examining the lengths of conserved retained introns relative to the non-  
404 conserved retained introns across 9 species does not reveal a universal trend. In  
405 *Arabidopsis*, *Brachypodium*, and foxtail millet, the length of conserved retained  
406 introns is significantly shorter than that of non-conserved (i.e. unique to only one  
407 species) retained intron (Table 3). However, in *Amborella* and African oil palm,  
408 the length of conserved retained introns is significantly longer than that of non-  
409 conserved retained introns. In banana, maize, sorghum and rice, there is no  
410 significant difference in retained intron length between conserved and non-  
411 conserved retained introns. However in the related grass species maize, rice and  
412 sorghum that exhibit large segments of genome co-linearity (Gale and Devos  
413 1998) the mean length of conserved retained intron is shorter than non-  
414 conserved retained introns, while the median lengths of conserved retained  
415 introns are similar or larger than those of non-conserved retained introns (Table  
416 3). A previous report suggested that the lengths of retained introns within  
417 *Arabidopsis* that are conserved in *Brassica* are shorter than non-conserved  
418 retained introns (Darracq and Adams 2013). We observed the same length trend  
419 in *Arabidopsis*, but this is not consistent in other species.

420         *Arabidopsis* TFs responsive to 14 diverse stress signals were retrieved  
421 from STIFDB V2.0 (Naika et al. 2013). TFs responsive to oxidative stress,  
422 dehydration, ABA, NaCl, drought, light, and cold have more AS relative to TFs  
423 responsive to the other 7 stresses (Table S4). Since the oxidative stress and  
424 dehydration responsive TFs only have 1 and 8 TFs with conserved AS,

425 respectively, we focus on the five major stresses where AS appears to play a  
426 significant role: ABA, NaCl, drought, light, and cold. The absolute number and  
427 percentage of AS in these TFs responsive to five major stresses are described in  
428 Table S4 together with the number and the percentage of conserved AS in these  
429 TFs. Two genes are particularly interesting, AT4G27410 (NAC transcription  
430 factor RD26) and AT1G78070 (Transducin/WD40 repeat-like superfamily  
431 protein). These two genes have conserved AS events and are responsive to all  
432 five stresses based on the data (Figure S2). RD26 has a conserved intron  
433 retention event across 7 of the 9 species we examined (absent in sorghum and  
434 *Brachypodium*). AT1G78070 has a conserved alternative terminal exon between  
435 sorghum, banana and *Arabidopsis*. These results indicate that there are AS events  
436 in stress-response TFs conserved among species across large phylogenetic  
437 distances, which suggests that AS may play an important role in the activity of  
438 some TFs during stress response.

#### 439 ***AS Conserved Between Monocot Grass and Non-Grass Species***

440         There are 239 AS events conserved between banana, African oil palm, and  
441 at least one of the five grass species examined (Table 2). 34 out of 239 conserved  
442 AS events are conserved across banana, African oil palm and five grass species  
443 (Table 2). 204 conserved AS events exist within the banana and African oil palm  
444 lineages but are absent from the grass species studied. 224 conserved AS events  
445 are conserved across the five grass species examined, and these are comprised of  
446 60 intron retention events, 106 alternative acceptor events, 37 alternative donor  
447 events and 21 exon skipping events (Table 2). Within the PACMAD clade, 1,544,  
448 1,488 and 1,323 AS events are conserved between maize vs. sorghum, maize vs.

449 foxtail millet, and sorghum vs. foxtail millet, respectively. In the BEP clade, 1,658  
450 conserved AS events are conserved between rice and *Brachypodium*. 4,333  
451 conserved AS events are conserved in at least one species in the BEP clade and  
452 one species in the PACMAD clade (Table 2). Maize clock genes (i.e circadian  
453 rhythm) GRMZM2G033962 (pseudoresponse regulator protein 37, *PRR37*) and  
454 GRMZM2G095727 (pseudoresponse regulator protein 73, *PRR73*) share a  
455 conserved intron retention that is also conserved across rice, *Brachypodium*, and  
456 foxtail millet. Our data suggests that this intron retention event is likely specific  
457 to members of the grass family; the role of intron retention in *PRR37* and *PRR73*  
458 controlling photoperiodic flowering needs further experimental investigation.

459         Since syntenic genes were more likely to transcribe transcripts and  
460 translate proteins than non-syntenic regions (Walley et al. 2016), we tested the  
461 hypothesis that AS and conserved AS is enriched in syntenic regions across grass  
462 species compared to non-syntenic regions. There are 11,996 syntenic gene  
463 clusters across five grass species including maize, sorghum, foxtail millet, rice,  
464 and *Brachypodium*. Since maize has undergone an additional whole genome  
465 duplication relative to the others, syntenic genes could be maize1 gene, maize2  
466 gene or both. In each of five grass species, we compared the proportion of genes  
467 within syntenic relationships that undergo AS vs. non-syntenic genes, and the  
468 proportion genes within syntenic relationships that have conserved AS events vs.  
469 the proportion of non-syntenic genes that have conserved AS events. The  
470 proportion of genes with syntenic relationships that exhibit AS is approximately  
471 twice that of genes in non-syntenic relationships (Figure 3). This trend is  
472 consistent across five grass species. Similarly, the proportion of genes that have  
473 conserved AS events that reside in syntenic regions is approximately twice that

474 of genes with conserved AS events that do not reside within syntenic regions  
475 (Figure 3). This suggests that genes within conserved syntenic blocks between  
476 present within the five grass species studied are enriched in both AS, and  
477 conserved AS events.

478 We examined selection pressure at the amino acid level on AS events  
479 conserved within grasses by performing pairwise comparisons of Ka/Ks ratios  
480 across the exonic regions flanking each conserved AS event (Figure 4). In total  
481 4,083 flanking exonic regions were examined, 1,999 from upstream exons and  
482 2,084 from downstream exons. We separated the Ka/Ks values for the flanking  
483 upstream and downstream portions of each alternative splicing type and plotted  
484 these values (Figure 4). In general, Ka/Ks values of exonic regions flanking  
485 conserved AS events are smaller than 1 (Figure 4), which suggest these regions  
486 are under purifying selection. There are 161 pairwise flanking region pairs with  
487 Ka/Ks value above 1, indicative potential candidate for positive selection. These  
488 include 67 from intron retention, 41 from alternative acceptor, 40 from  
489 alternative donor, 8 from exon skipping and 5 from terminal alternate exon. We  
490 did not detect a statistically significant difference in Ka/Ks between exons  
491 upstream and downstream of conserved intron retention, alternative acceptor,  
492 and exon skipping events. However, a significant difference in Ka/Ks was  
493 observed between upstream and downstream exons flanking conserved  
494 alternative donor events ( $P < 0.001$ , Wilcoxon Rank-Sum Test) and alternate  
495 terminal exon ( $P < 0.001$ , Wilcoxon Rank-Sum Test). In general, these results  
496 suggest that the regions flanking conserved AS events in grasses are undergoing  
497 purifying selection, which may be maintaining *cis*- signals required for AS and  
498 somewhat responsible for maintaining sequence conservation across species.

499 ***Conserved AS is More Common Among Single Copy Genes***

500 We tested the functional sharing hypothesis between single copy genes  
501 vs. non-single copy genes by measuring the number of genes within each  
502 category that exhibit conserved AS events. 2,985 single copy genes including  
503 strict and mostly single copy were described in *Arabidopsis* (De Smet et al. 2013).  
504 Han et al. (2014) suggested single copy genes had increased levels of AS relative  
505 to genes from large gene families and a decreased proportion of AS compared to  
506 genes from small gene families. Similarly, Su and Gu (2012) suggested that single  
507 copy genes had more isoforms per gene compared to the genes from large gene  
508 families but similar average isoform counts per gene compared to the genes from  
509 small gene families.

510 We compared the number of conserved AS genes between single copy  
511 genes vs. non-single copy genes irrespective of gene family size. 2,717 out of  
512 2,985 single copy genes are multi-exon genes. 1,113 out of the 2,717 multi-exon  
513 genes have evidence of AS in *Arabidopsis* based on the Araport11 transcripts. In  
514 the 19,700 non-single copy multi-exon genes, there are 6,751 that exhibit AS.  
515 Among multi-exon genes, the single copy genes have significantly more AS  
516 compared to the rest of multi-exon genes ( $P < 0.0001$ , Chi-square with Yates'  
517 correction). Among the 944 *Arabidopsis* genes with conserved AS events in our  
518 analysis, 173 were from 1,113 single copy AS genes, while the remaining 771  
519 were from the 6,751 non-single copy AS genes. Single copy genes in *Arabidopsis*  
520 showed significantly enriched in conserved AS events ( $P < 0.0001$ , Chi-square  
521 with Yates' correction). These results suggest that among multi-exon genes in

522 *Arabidopsis*, a greater proportion of single copy genes both undergo AS and  
523 harbor conserved AS events than do non-single copy genes.

524 ***Conserved AS is More Common Among SR Protein Genes Relative to hnRNP***  
525 ***Proteins***

526         Similar to previous observations (Kalyna et al. 2006, Rauch et al. 2014,  
527 Chamala et al. 2015), AS events were detected in SR proteins. 19 out of 21 SR  
528 proteins in maize demonstrate AS, and 13 out of 19 alternatively spliced SR  
529 protein genes in maize showed 24 conserved AS events with other species  
530 including 13 intron retention events, 4 alternative acceptor events, 4 alternative  
531 donor events and 3 exon skipping events (Table S5). 10 out of 24 conserved AS  
532 events are present in at least five species. Richardson et al. (2011) identified two  
533 SR proteins (GRMZM2G110143 and GRMZM2G170365) in maize with evidence  
534 of positive selection (Supplemental Table5). These two genes also have  
535 conserved AS events across 2 and 4 species, respectively. Zm-SCL30  
536 (GRMZM2G065066), previously identified in maize, responds to both cold and  
537 heat response (Mei et al. In Review). SCL30 has alternative acceptor, alternative  
538 donor, and exon skipping events conserved across grass species and *Amborella*,  
539 as well as two intron retention events only conserved within the grass lineage.  
540 Altogether, there are 4 maize SR proteins (2 in the RS subfamily, 1 in the SC  
541 subfamily, and 1 in the SCL subfamily) that demonstrate 6 conserved AS events  
542 with *Amborella* (Table S5), which supports the existence of a deeply conserved  
543 splicing mechanism in SR proteins. 10 out of 40 hnRNP proteins in maize exhibit  
544 evidence for 17 conserved AS events, 10 of which are intron retention events, 4  
545 alternative acceptor events, 2 alternative donor events, and 1 exon skipping

546 events (Supplemental Table5). None of these 17 conserved AS events are  
547 conserved across more than four species. 3 of the 17 conserved AS events from 3  
548 hnRNP genes in maize are conserved with *Amborella* (Table S5), while 6 out of  
549 24 AS events from 4 SR proteins in maize are conserved with *Amborella*. These  
550 results suggest that the signals for AS within SR protein genes across species are  
551 better conserved than those within the hnRNP protein encoding genes.

### 552 ***Conservation and Subfunctionalization of SR Proteins After Whole Genome*** 553 ***Duplication***

554 We used a phylogenetic approach to identify conserved AS across the SR  
555 protein subfamilies in maize and sorghum. An ancestral exon skipping event is  
556 conserved across all members of this subfamily in maize and sorghum (Figure  
557 5A). Intriguingly, all three maize SR subfamily genes were reduced to one copy  
558 after whole genome duplication; one gene lost a homeologous copy from maize  
559 subgenome1, and two genes lost their homeologous copies from subgenome2.  
560 The plant-specific RS subfamily also has a shared exon skipping in the second  
561 long intron region coding RRM domain both in maize and sorghum (Figure 5A).  
562 The exon skipping isoform generates a complete RRM domain. Kalyna et al.  
563 (2006) suggested this long intron is conserved from green algae to angiosperms,  
564 and the splice site is retained between monocot and eudicot lineages. Our  
565 analysis suggests that this exon skipping event is preserved in maize, sorghum,  
566 rice, *Brachypodium*, foxtail millet and *Amborella*. In the plant-specific RS2Z  
567 subfamily, maize maintained both copies of the genes after whole genome  
568 duplication. Remarkably, two sorghum genes Sobic.009G022100 and  
569 Sobic.009G022200 are next to each other but in opposite directions on the



570 chromosome, which suggests one copy may be the result of a tandem  
571 duplication. Based on phylogenetic evidence Sobic.009G022200 might be the  
572 older copy (Richardson et al. 2011). Not only did Sobic.009G022200 and two  
573 duplicate genes in maize retain an exon skipping event, but they also contain two  
574 intron retention events surrounding the skipped exon (Figure 5B).  
575 Sobic.009G022100 and the two duplicate genes in maize (GRMZM2G099317 and  
576 GRMZM2G474658) apparently diverged their AS isoforms (Figure 5B).  
577 Sobic.009G022100 only preserved the exon skipping isoform, which would  
578 generate a complete RRM domain. GRMZM2G099317 retained the intron  
579 retention event on the right side, and the exon skipping event. For the second  
580 copy, GRMZM2G474658, the intron retention event on the left side is retained as  
581 well as an alternative acceptor event. There is one additional sorghum gene  
582 Sobic.003G064400 without conserved synteny in maize, which suggests maize  
583 might have lost both syntenic copies that had represented orthologues of this  
584 sorghum gene. The AS pattern of this gene is similar to AS pattern of  
585 GRMZM2G474658 (Figure 5B). The alternative long intron in the RS2Z subfamily  
586 is also conserved from mosses to angiosperms (Kalyna et al. 2006).

### 587 ***R2R3-MYB is Tightly Connected with a Plant-Specific SR Protein Subfamily***

588 We used a network building approach to identify the degree of  
589 interactivity of TFs with conserved AS in response to five stresses (ABA, drought,  
590 cold, NaCl and light) based on protein-protein interactions in STRING v10  
591 (Szklarczyk et al. 2014). Several interesting relationships showed up in the  
592 network (Figure S3). Ubiquitin genes such as UBQ10, UBQ11, and UBQ14 are  
593 centralized in the network, which suggests AS might play a role in the

594 susceptibility of translated isoforms to ubiquitin mediated degradation.  
595 Ubiquitin genes are closely associated with splicing related genes (such as  
596 RS2Z33, RS41, RS2Z32, RS40, U2AF65A, SR45, SCL33) via *Glycine Rich Protein 7*  
597 (GRP7). GRP7 is part of the circadian clock and negatively auto-regulates its own  
598 protein abundance by producing a non-productive AS isoform that is subject to  
599 the nonsense-mediated decay (NMD) pathway (Schöning et al. 2007, Schöning et  
600 al. 2008). In addition, we identified the MYB gene network is associated with  
601 splicing network genes through the proline-rich spliceosome-associated protein  
602 (AT4G21660) (Figure S3). The MYB genes identified in this network belong to  
603 the R2R3-MYB family. The R2R3-MYB family has undergone expansion in plants  
604 (Du et al. 2014) and plays many important plant-specific roles. Furthermore,  
605 there are many kinase and phosphatase related genes in close association with  
606 genes responsible for phosphorylation and dephosphorylation of splicing  
607 regulators, such as serine-threonine protein kinase (CIPK3), calcium-dependent  
608 protein kinase 29 (CPK29), CBL-interacting protein kinase 9 (CIPK9), and  
609 calcineurin b-like protein (CBL1). CBL1 has been identified as a salt-tolerance  
610 gene and connects with components of the spliceosome (Feng et al. 2015). CBL2  
611 and CBL3 together with CIPK3 and CIPK9 can form a calcium network to regulate  
612 magnesium levels, while CBL1 is a calcium sensor (Tang et al. 2015). Here, AS of  
613 CBL1 and CIPK3, CIPK9 could potentially participate in regulating magnesium  
614 levels through a feedback loop sensitive to calcium concentration.

615 We also examined the networks containing genes in *Arabidopsis* with  
616 conserved AS events with *Amborella* and at least one species of monocot. Most of  
617 the genes present in the network were from the plant-specific SR protein  
618 subfamily, such as RS2Z, RS, and SR45a. In addition, TFIIIA is connected to the

619 splicing protein network via RNA-binding protein (AT4G35785). TFIIA has an  
620 exon skipping event that is conserved across the land plants (Barbazuk 2010, Fu  
621 et al. 2009). Similar to the network based on TFs in response to stress, we  
622 identified a close connection between the R2R3-MYB class with a splicing  
623 protein network via TFIID-1 (AT3G13445) and proline-rich spliceosome-  
624 associated family protein (AT4G21660) (Figure 6). These R2R3-MYBs are  
625 involved in many important functions, such as glucosinolate biosynthesis,  
626 phenylpropanoid pathway, conical epidermal cell outgrowth, drought and  
627 pathogens ABA- and JA- mediated, and cuticular wax biosynthesis (Table S6).

## 628 **Discussion**

629         In this study, we utilized a bioinformatics scheme to detect AS events and  
630 identify those which are conserved across 9 plant species by mining publicly  
631 available RNA-Seq data. In total, across all 9 species, 9,804 AS events conserved  
632 between 2 or more species are defined within 19,235 genes. New sequenced  
633 plant genomes and vast amounts of RNA-Seq are increasingly deposited into  
634 NCBI's Sequence Read Archive (SRA). These are treasure troves of data waiting  
635 to be mined for new discoveries. Many are already tapping into this wealth, as  
636 exemplified by (Nellore et al. 2016) who examined splice junction variants in the  
637 human genome, and Chamala et al. (2015) who examined conserved AS events  
638 across several species of eudicots. The method we describe here can be used to  
639 mine to identify conserved AS events within any species with an available  
640 genome sequence and deep RNA-Seq data.

641

642 ***AS Shows Widely Conserved Across Species but Likely Undergone***

643 ***Complicated Patterns of Gain and Loss***

644 Each species examined has one to three thousand genes with evidence of  
645 conserved AS. *Arabidopsis* has least number of genes with conserved AS (944),  
646 while maize has the greatest number of genes (3,687) (Figure 2). The smallest  
647 percentage of conserved AS genes among genes that undergo AS is *Arabidopsis*  
648 (12.0%), while foxtail millet has the greatest percentage of conserved AS genes  
649 among genes with AS (36.2%). We identified 1,413 genes with conserved AS  
650 events in *Amborella*, which account for 18.3% of the genes in *Amborella* with  
651 evidence of AS. One conserved exon skipping event occurs within the gene  
652 encoding an RNA-binding KH domain-containing protein. This conserved AS  
653 event was detected in 8 of the 9 species RNA-Seq data examined, but was  
654 apparently absent in *Arabidopsis*. However, this isoform is reported within the  
655 AtRTD *Arabidopsis* transcriptome data (Zhang et al. 2015) indicating that it is  
656 broadly conserved across all species investigated here. RNA-binding KH domain  
657 proteins are vital for heat stress-responsive gene regulation (Guan et al. 2013).  
658 The alternatively spliced exon within this RNA-binding KH domain-containing  
659 protein has high sequence similarity across nine species studied (Figure 7) and  
660 this AS event is likely conserved broadly across angiosperms. Similar to a  
661 previous study that identified that alternative donor and alternative acceptor  
662 events were found to be significantly enriched between *Arabidopsis* and *Brassica*  
663 (Darracq and Adams 2013), we identified a significant enrichment of alternative  
664 donor and alternative acceptor events that were conserved in at least three  
665 species relative to those conserved in only two species, and a significant  
666 enrichment of exon skipping events conserved in at least four species relative to

667 those conserved in only two species. We observed that *Arabidopsis*,  
668 *Brachypodium* and foxtail millet retained introns that are conserved have  
669 significantly shorter lengths compared to non-conserved retained introns, which  
670 is consistent with a previous report in *Arabidopsis* (Table 3) (Darracq and Adams  
671 2013). However, this trend is not observed across all the species examined.  
672 Conserved retained introns in *Amborella* and African oil palm are longer than  
673 those retained introns that were not conserved, and there are no significant  
674 differences in the lengths of conserved retained introns vs. non-conserved  
675 introns in banana, maize, rice, and sorghum.

676         The plant specific RS and RS2Z subfamilies associate with the R2R3-MYB  
677 class within the network built from *Arabidopsis* genes demonstrating conserved  
678 AS with *Amborella* and at least one species of monocots. Many R2R3-MYB genes  
679 are represented in this network and possess plant-specific functions (Table S6).  
680 Li et al. (2006) identified conserved AS events within MYB59 and MYB48. Both  
681 genes are represented within our network and associate with SR proteins via a  
682 proline-rich spliceosome-associated protein AT4G21660 (Figure 6). Together,  
683 these results suggest a conserved connection between splicing factors and R2R3-  
684 MYB transcription factors. These two protein classes may cooperate during  
685 developmental processes and stress response in plants.

### 686 ***Grass Lineage Enriched for Conserved Alternative Splicing***

687         Within monocots we identified lineage-specific conserved AS events.  
688 There are 204 conserved AS events between banana and African oil palm that  
689 are absent in the grass species examined, likely lost in the grass family, and 239  
690 conserved AS events conserved in banana, African oil palm and at least one grass

691 species. The number of conserved AS between two species in the PACMAD clade  
692 (maize, sorghum, and foxtail millet) is similar to the number of conserved AS  
693 events between two species within the BEP clade (rice and *Brachypodium*). 224  
694 conserved AS events were found conserved across five grass species examined  
695 (maize, sorghum, foxtail millet, rice, and *Brachypodium*). In addition, the  
696 proportion of genes within syntenic blocks with AS events in the grasses is  
697 approximately twice that compared to those outside of syntenic blocks, and this  
698 trend is also mirrored across those genes with conserved AS events (Figure 3).

699 In general, the average values of  $K_a/K_s$  across different AS events are less  
700 than 1, which suggests that the flanking exonic regions are undergoing purifying  
701 selection for conserved AS events. In contrast, previous studies have suggested  
702 only moderate selection pressure on the alternative vs. the constitutive regions  
703 (Xing and Lee 2006, Chen et al. 2006, Xing and Lee 2005). However, the selection  
704 on the flanking region of conserved AS is less explored, particularly in plants. In  
705 intron retention, alternative acceptor and exon skipping, there is no significant  
706 difference in  $K_a/K_s$  between flanking upstream and downstream exonic regions  
707 (Figure 4); however, we did observe significantly higher  $K_a/K_s$  in the upstream  
708 compared to downstream flanking regions in alternative donor and alternative  
709 terminal exon. These results indicate that the flanking downstream regions have  
710 stronger purifying selection compared to the upstream regions in AltD and ATE  
711 events, which suggest that a proportion of flanking upstream and downstream  
712 exonic regions of conserved AS events might harbor splicing regulatory  
713 elements.

714 We observed both conserved and subfunctionalization patterns of AS  
715 within SR protein encoding genes after the whole genome duplication event in

716 the maize lineage. The plant-specific RS subfamily in maize and sorghum harbor  
717 conserved exon skipping although the maize orthologue has been reduced to a  
718 single copy after whole genome duplication (Figure 5A). In the RS2Z family,  
719 Maize has retained both homeologous copies of the RS2Z subfamily genes. In one  
720 case, it has maintained the conserved AS events in both maize homeologues  
721 including exon skipping and intron retention events (Figure 5B), however, in  
722 another case, the AS events have diverged between the sorghum gene and its two  
723 maize homoelogs (Figure 5B).

724 ***Important Functional Conserved AS in SR Protein in Response to***  
725 ***Environment Stress***

726 Many stress responsive TFs have conserved AS. We focused on identifying  
727 conserved AS in stress responsive TFs during five major stresses: ABA, salt  
728 (NaCl), drought, light, and cold. Two genes AT1G78070 (Transducin/WD40  
729 repeat-like superfamily protein) and AT4G27410 (RD26) are expressed during  
730 all five stresses. RD26 encodes a NAC transcription factor induced in response to  
731 desiccation. In our data, RD26 has conserved AS in 7 out of the 9 species we  
732 examined (except sorghum and *Brachypodium*), however we don't have data to  
733 test whether this conserved AS is stress responsive. As illustrated in Figure S4,  
734 the exonic flanking sequence of this intron retention event has the highest  
735 sequence conservation across species than any other region of the gene,  
736 although there remains some similarity between maize and sorghum in the  
737 conserved intron region. This conserved intron retention event is likely broadly  
738 conserved across angiosperms.

739           Within the protein-protein interaction network based on *Arabidopsis*  
740 stress response TFs with conserved AS events identified in our data sets, we  
741 detect phosphatases, kinases and several ubiquitin genes in the center of the  
742 network (Figure 6). This result is in line with the recent discovery that  
743 alternative exons and exons (exon-like introns) have more phosphorylation  
744 sites and ubiquitination sites compared to constitutive exons (Marquez et al.  
745 2015). In these conserved AS genes across the angiosperms, AS may be involved  
746 in signaling pathways responsible for de/phosphorylation and protein  
747 degradation pathways, which suggests an important regulatory role in plants.  
748 Furthermore, we detected an association between plant-specific RS2Z and RS  
749 subfamily splicing proteins and R2R3-MYB proteins via proline-rich  
750 spliceosome-associated proteins, suggesting the R2R3-MYB family and splice  
751 regulators may interact during abiotic stress responses (Figure 6). Another  
752 interesting finding in the network is SPA3 (Figure 6). In moss, red and blue light  
753 photoreceptors were shown to regulate AS and intron retention was mis-  
754 regulated in moss mutants defective in the red light sensing phytochromes (Wu  
755 et al. 2014), which suggests an ancient connection between light regulation and  
756 conserved AS in land plants. We found both conserved alternative donor and  
757 intron retention events in SPA3, which acts as a negative regulator during light  
758 signaling via suppression of photomorphogenesis (Laubinger and Hoecker  
759 2003). The truncated protein produced by two AS events in SPA3 will properly  
760 interact with COPI but loses the ability to bind to DDB1 (Shikata et al. 2014).  
761 SPA3 is connected to 9 additional kinase genes in the network, all of which have  
762 conserved AS across the angiosperms (Figure 6). This suggests that AS of kinases  
763 might play an important role in the regulation of the light signal, perhaps by



764 affecting a kinase mediated signal cascade linked to SPA3. Inclusive, our study  
765 suggests the conserved AS landscape in plants is complicated and needs further  
766 functional study to link the phenotype to conserved AS events and identify the  
767 regulatory code for functional relevant AS.

#### 768 **Authors' Contributions**

769 WM, WBB designed the work. WM, WBB, LB, GF, JCS analyzed the data. WM and  
770 WBB wrote the manuscript with input from LB, GF and JCS.

#### 771 **Acknowledgements**

772 We thank Daniel Gates and Emily Josephs provide helpful comments for the  
773 manuscript. This work was supported by Department of Biological Sciences at  
774 University of Florida, Florida Genetics Institute, Graduate Student Fellowship  
775 and College of Liberal Arts and Sciences Dissertation Fellowship from University  
776 of Florida awarded to WM and National Science Foundation grants IOS-0922742  
777 & IOS-1547787 (WBB).

#### 778 **Competing Interests**

779 The author(s) declare(s) that they have no competing interests.

## Literature Cited

- Abdel-Ghany, Salah E, Michael Hamilton, Jennifer L Jacobi, Peter Ngam, Nicholas Devitt, Faye Schilkey, Asa Ben-Hur, and Anireddy SN Reddy. 2016. "A survey of the sorghum transcriptome using single-molecule long reads." *Nature communications* 7.
- Amborella, Genome Project. 2013. "The Amborella genome and the evolution of flowering plants." *Science* 342 (6165):1241089. doi: 10.1126/science.1241089.
- Barbazuk, W Brad. 2010. "A conserved alternative splicing event in plants reveals an ancient exonization of 5S rRNA that regulates TFIIA." *RNA biology* 7 (4):397-402.
- Bennetzen, Jeffrey L, Jeremy Schmutz, Hao Wang, Ryan Percifield, Jennifer Hawkins, Ana C Pontaroli, Matt Estep, Liang Feng, Justin N Vaughn, and Jane Grimwood. 2012. "Reference genome sequence of the model plant *Setaria*." *Nature biotechnology* 30 (6):555-561.
- Busch, Anke, and Klemens J Hertel. 2012. "Evolution of SR protein and hnRNP splicing regulatory factors." *Wiley Interdisciplinary Reviews: RNA* 3 (1):1-12.
- Campbell, M. A., B. J. Haas, J. P. Hamilton, S. M. Mount, and C. R. Buell. 2006. "Comprehensive analysis of alternative splicing in rice and comparative analyses with *Arabidopsis*." *Bmc Genomics* 7. doi: 10.1186/1471-2164-7-327.
- Chamala, Srikar, Guanqiao Feng, Carolina Chavarro, and W Brad Barbazuk. 2015. "Genome-wide identification of evolutionarily conserved alternative

splicing events in flowering plants." *Frontiers in bioengineering and biotechnology* 3.

Chen, Feng-Chi, Sheng-Shun Wang, Chuang-Jong Chen, Wen-Hsiung Li, and Trees-Juen Chuang. 2006. "Alternatively and constitutively spliced exons are subject to different evolutionary forces." *Molecular biology and evolution* 23 (3):675-682.

Cheng, CHIA-YI, Vivek Krishnakumar, Agnes Chan, Seth Schobel, and Christopher D Town. 2016. "Araport11: a complete reannotation of the Arabidopsis thaliana reference genome." *bioRxiv*:047308.

Chuang, Trees-Juen, Min-Yu Yang, Chuang-Chieh Lin, Ping-Hung Hsieh, and Li-Yuan Hung. 2015. "Comparative genomics of grass EST libraries reveals previously uncharacterized splicing events in crop plants." *BMC plant biology* 15 (1):1.

Cotton, Joseph L, William P Wysocki, Lynn G Clark, Scot A Kelchner, J Chris Pires, Patrick P Edger, Dustin Mayfield-Jones, and Melvin R Duvall. 2015. "Resolving deep relationships of PACMAD grasses: a phylogenomic approach." *BMC plant biology* 15 (1):1.

D'Hont, Angélique, France Denoeud, Jean-Marc Aury, Franc-Christophe Baurens, Françoise Carreel, Olivier Garsmeur, Benjamin Noel, Stéphanie Bocs, Gaëtan Droc, and Mathieu Rouard. 2012. "The banana (*Musa acuminata*) genome and the evolution of monocotyledonous plants." *Nature* 488 (7410):213-217.

Darracq, Aude, and Keith L. Adams. 2013. "Features of evolutionarily conserved alternative splicing events between Brassica and Arabidopsis." *New Phytologist* 199 (1):252-263. doi: 10.1111/nph.12238.

- De Smet, Riet, Keith L Adams, Klaas Vandepoele, Marc CE Van Montagu, Steven Maere, and Yves Van de Peer. 2013. "Convergent gene loss following gene and genome duplications creates single-copy families in flowering plants." *Proceedings of the National Academy of Sciences* 110 (8):2898-2903.
- Droc, Gaetan, Delphine Lariviere, Valentin Guignon, Nabila Yahiaoui, Dominique This, Olivier Garsmeur, Alexis Dereeper, Chantal Hamelin, Xavier Argout, and Jean-François Dufayard. 2013. "The banana genome hub." *Database* 2013:bat035.
- Du, Hai, Zhe Liang, Sen Zhao, Ming-Ge Nan, LS Tran, Kun Lu, Yu-Bi Huang, and Jia-Na Li. 2014. "The Evolutionary History of R2R3-MYB Proteins Across 50 Eukaryotes: New Insights Into Subfamily Classification and Expansion." *Scientific reports* 5:11037-11037.
- Du, Zhou, Xin Zhou, Yi Ling, Zhenhai Zhang, and Zhen Su. 2010. "agriGO: a GO analysis toolkit for the agricultural community." *Nucleic acids research*:gkq310.
- Duvick, Jon, Ann Fu, Usha Muppирala, Mukul Sabharwal, Matthew D. Wilkerson, Carolyn J. Lawrence, Carol Lushbough, and Volker Brendel. 2008. "PlantGDB: a resource for comparative plant genomics." *Nucleic Acids Research* 36:D959-D965. doi: 10.1093/nar/gkm1041.
- Edgar, Robert C. 2004. "MUSCLE: multiple sequence alignment with high accuracy and high throughput." *Nucleic acids research* 32 (5):1792-1797.
- Emms, David M, and Steven Kelly. 2015. "OrthoFinder: solving fundamental biases in whole genome comparisons dramatically improves orthogroup inference accuracy." *Genome biology* 16 (1):1-14.

- Feng, Jinlin, Jingjing Li, Zhaoxu Gao, Yaru Lu, Junya Yu, Qian Zheng, Shuning Yan, Wenjiao Zhang, Hang He, and Ligeng Ma. 2015. "SKIP confers osmotic tolerance during salt stress by controlling alternative gene splicing in Arabidopsis." *Molecular plant* 8 (7):1038-1052.
- Filichkin, S. A., H. D. Priest, S. A. Givan, R. K. Shen, D. W. Bryant, S. E. Fox, W. K. Wong, and T. C. Mockler. 2010. "Genome-wide mapping of alternative splicing in Arabidopsis thaliana." *Genome Research* 20 (1):45-58. doi: 10.1101/gr.093302.109.
- Fu, Yan, Oliver Bannach, Hao Chen, Jan-Hendrik Teune, Axel Schmitz, Gerhard Steger, Liming Xiong, and W Brad Barbazuk. 2009. "Alternative splicing of anciently exonized 5S rRNA regulates plant transcription factor TFIIA." *Genome research* 19 (5):913-921.
- Gale, Michael D, and Katrien M Devos. 1998. "Comparative genetics in the grasses." *Proceedings of the National Academy of Sciences* 95 (5):1971-1974.
- Goff, Stephen A, Darrell Ricke, Tien-Hung Lan, Gernot Presting, Ronglin Wang, Molly Dunn, Jane Glazebrook, Allen Sessions, Paul Oeller, and Hemant Varma. 2002. "A draft sequence of the rice genome (*Oryza sativa* L. ssp. japonica)." *Science* 296 (5565):92-100.
- Goodstein, David M, Shengqiang Shu, Russell Howson, Rochak Neupane, Richard D Hayes, Joni Fazo, Therese Mitros, William Dirks, Uffe Hellsten, and Nicholas Putnam. 2012. "Phytozome: a comparative platform for green plant genomics." *Nucleic acids research* 40 (D1):D1178-D1186.
- Grabherr, M. G., B. J. Haas, M. Yassour, J. Z. Levin, D. A. Thompson, I. Amit, X. Adiconis, L. Fan, R. Raychowdhury, Q. D. Zeng, Z. H. Chen, E. Mauceli, N.

- Hacohen, A. Gnirke, N. Rhind, F. di Palma, B. W. Birren, C. Nusbaum, K. Lindblad-Toh, N. Friedman, and A. Regev. 2011. "Full-length transcriptome assembly from RNA-Seq data without a reference genome." *Nature Biotechnology* 29 (7):644-U130. doi: 10.1038/nbt.1883.
- Guan, Qingmei, Changlong Wen, Haitao Zeng, and Jianhua Zhu. 2013. "A KH domain-containing putative RNA-binding protein is critical for heat stress-responsive gene regulation and thermotolerance in Arabidopsis." *Molecular plant* 6 (2):386-395.
- Haas, Brian J, Arthur L Delcher, Stephen M Mount, Jennifer R Wortman, Roger K Smith Jr, Linda I Hannick, Rama Maiti, Catherine M Ronning, Douglas B Rusch, and Christopher D Town. 2003. "Improving the Arabidopsis genome annotation using maximal transcript alignment assemblies." *Nucleic acids research* 31 (19):5654-5666.
- Hammond, Ming C, Andreas Wachter, and Ronald R Breaker. 2009. "A plant 5S ribosomal RNA mimic regulates alternative splicing of transcription factor IIIA pre-mRNAs." *Nature structural & molecular biology* 16 (5):541-549.
- Han, Fengming, Yong Peng, Lijia Xu, and Peigen Xiao. 2014. "Identification, characterization, and utilization of single copy genes in 29 angiosperm genomes." *BMC genomics* 15 (1):504.
- James, Allan B, Naeem Hasan Syed, Simon Bordage, Jacqueline Marshall, Gillian A Nimmo, Gareth I Jenkins, Pawel Herzyk, John WS Brown, and Hugh G Nimmo. 2012. "Alternative splicing mediates responses of the Arabidopsis circadian clock to temperature changes." *The Plant Cell* 24 (3):961-981.

- Jiang, Wen-kai, Yun-long Liu, En-hua Xia, and Li-zhi Gao. 2013. "Prevalent role of gene features in determining evolutionary fates of whole-genome duplication duplicated genes in flowering plants." *Plant physiology* 161 (4):1844-1861.
- Kalyna, Maria, Sergiy Lopato, Viktor Voronin, and Andrea Barta. 2006. "Evolutionary conservation and regulation of particular alternative splicing events in plant SR proteins." *Nucleic acids research* 34 (16):4395-4405.
- Laubinger, Sascha, and Ute Hoecker. 2003. "The SPA1-like proteins SPA3 and SPA4 repress photomorphogenesis in the light." *The Plant Journal* 35 (3):373-385.
- Lawrence, C. J., O. F. Dong, M. L. Polacco, T. E. Seigfried, and V. Brendel. 2004. "MaizeGDB, the community database for maize genetics and genomics." *Nucleic Acids Research* 32:D393-D397. doi: 10.1093/nar/gkh011.
- Le, Si Quang, Cuong Cao Dang, and Olivier Gascuel. 2012. "Modeling protein evolution with several amino acid replacement matrices depending on site rates." *Molecular biology and evolution*:mss112.
- Lee, Yeon, and Donald C Rio. 2015. "Mechanisms and regulation of alternative pre-mRNA splicing." *Annual review of biochemistry* 84:291.
- Li, Jigang, Xiaojuan Li, Lei Guo, Feng Lu, Xiaojie Feng, Kun He, Liping Wei, Zhangliang Chen, Li-Jia Qu, and Hongya Gu. 2006. "A subgroup of MYB transcription factor genes undergoes highly conserved alternative splicing in Arabidopsis and rice." *Journal of Experimental Botany* 57 (6):1263-1273.

- Li, Qin, Guanghui Xiao, and Yu-Xian Zhu. 2014. "Single-nucleotide resolution mapping of the *Gossypium raimondii* transcriptome reveals a new mechanism for alternative splicing of introns." *Molecular plant* 7 (5):829-840.
- Mandadi, Kranthi K, and Karen-Beth G Scholthof. 2015. "Genome-wide analysis of alternative splicing landscapes modulated during plant-virus interactions in *Brachypodium distachyon*." *The Plant Cell* 27 (1):71-85.
- Marquez, Y., J. W. S. Brown, C. Simpson, A. Barta, and M. Kalyna. 2012. "Transcriptome survey reveals increased complexity of the alternative splicing landscape in *Arabidopsis*." *Genome Research* 22 (6):1184-1195. doi: 10.1101/gr.134106.111.
- Marquez, Yamile, Markus Höpfler, Zahra Ayatollahi, Andrea Barta, and Maria Kalyna. 2015. "Unmasking alternative splicing inside protein-coding exons defines exons and their role in proteome plasticity." *Genome research*:gr. 186585.114.
- Mastrangelo, Anna M, Daniela Marone, Giovanni Laidò, Anna M De Leonardis, and Pasquale De Vita. 2012. "Alternative splicing: enhancing ability to cope with stress via transcriptome plasticity." *Plant Science* 185:40-49.
- Naika, Mahantesha, Khader Shameer, Oommen K Mathew, Ramanjini Gowda, and Ramanathan Sowdhamini. 2013. "STIFDB2: an updated version of plant stress-responsive transcription factor database with additional stress signals, stress-responsive transcription factor binding sites and stress-responsive genes in *Arabidopsis* and rice." *Plant and Cell Physiology* 54 (2):e8-e8.



- Nellore, Abhinav, Andrew E Jaffe, Jean-Philippe Fortin, José Alquicira-Hernández, Leonardo Collado-Torres, Siruo Wang, Robert A Phillips, Nishika Karbhari, Kasper D Hansen, Ben Langmead, and Jeffrey T Leek. 2016. "Human splicing diversity across the Sequence Read Archive." *bioRxiv*. doi: 10.1101/038224.
- Pan, Qun, Ofer Shai, Leo J Lee, Brendan J Frey, and Benjamin J Blencowe. 2008. "Deep surveying of alternative splicing complexity in the human transcriptome by high-throughput sequencing." *Nature genetics* 40 (12):1413-1415.
- Panahi, Bahman, Bahram Abbaszadeh, Mehdi Taghizadeghan, and Esmaeil Ebrahimie. 2014. "Genome-wide survey of alternative splicing in Sorghum bicolor." *Physiology and Molecular Biology of Plants* 20 (3):323-329.
- Paterson, Andrew H, John E Bowers, Remy Bruggmann, Inna Dubchak, Jane Grimwood, Heidrun Gundlach, Georg Haberer, Uffe Hellsten, Therese Mitros, and Alexander Poliakov. 2009. "The Sorghum bicolor genome and the diversification of grasses." *Nature* 457 (7229):551-556.
- Pertea, Mihaela, Geo M. Pertea, Corina M. Antonescu, Tsung-Cheng Chang, Joshua T. Mendell, and Steven L. Salzberg. 2015. "StringTie enables improved reconstruction of a transcriptome from RNA-seq reads." *Nature Biotechnology* 33 (3):290-+. doi: 10.1038/nbt.3122.
- Rambaldi, Davide, and Francesca D Ciccarelli. 2009. "FancyGene: dynamic visualization of gene structures and protein domain architectures on genomic loci." *Bioinformatics* 25 (17):2281-2282.
- Rauch, Hypaitia B, Tara L Patrick, Katarina M Klusman, Fabia U Battistuzzi, Wenbin Mei, Volker P Brendel, and Shailesh K Lal. 2014. "Discovery and

expression analysis of alternative splicing events conserved among plant SR proteins." *Molecular biology and evolution* 31 (3):605-613.

Reddy, Anireddy S. N., Mark F. Rogers, Dale N. Richardson, Michael Hamilton, and Asa Ben-Hur. 2012. "Deciphering the plant splicing code: experimental and computational approaches for predicting alternative splicing and splicing regulatory elements." *Frontiers in plant science* 3:18-18. doi: 10.3389/fpls.2012.00018.

Reddy, Anireddy SN, Yamile Marquez, Maria Kalyna, and Andrea Barta. 2013. "Complexity of the alternative splicing landscape in plants." *The Plant Cell* 25 (10):3657-3683.

Richardson, Dale N, Mark F Rogers, Adam Labadorf, Asa Ben-Hur, Hui Guo, Andrew H Paterson, and Anireddy SN Reddy. 2011. "Comparative analysis of serine/arginine-rich proteins across 27 eukaryotes: insights into sub-family classification and extent of alternative splicing." *PLoS One* 6 (9):e24542.

Schnable, James C, Michael Freeling, and Eric Lyons. 2012. "Genome-wide analysis of syntenic gene deletion in the grasses." *Genome biology and evolution* 4 (3):265-277.

Schnable, Patrick S, Doreen Ware, Robert S Fulton, Joshua C Stein, Fusheng Wei, Shiran Pasternak, Chengzhi Liang, Jianwei Zhang, Lucinda Fulton, and Tina A Graves. 2009. "The B73 maize genome: complexity, diversity, and dynamics." *science* 326 (5956):1112-1115.

Schöning, Jan C, Corinna Streitner, Irmtraud M Meyer, Yahong Gao, and Dorothee Staiger. 2008. "Reciprocal regulation of glycine-rich RNA-binding proteins via an interlocked feedback loop coupling alternative splicing to

nonsense-mediated decay in Arabidopsis." *Nucleic acids research* 36 (22):6977-6987.

Schöning, Jan C, Corinna Streitner, Damian R Page, Sven Hennig, Kenko Uchida, Eva Wolf, Masaki Furuya, and Dorothee Staiger. 2007. "Auto-regulation of the circadian slave oscillator component AtGRP7 and regulation of its targets is impaired by a single RNA recognition motif point mutation." *The Plant Journal* 52 (6):1119-1130.

Severing, Edouard I, Aalt DJ Dijk, Willem J Stiekema, and Roeland CHJ Ham. 2009. "Comparative analysis indicates that alternative splicing in plants has a limited role in functional expansion of the proteome." *BMC genomics* 10 (1):1.

Shannon, Paul, Andrew Markiel, Owen Ozier, Nitin S Baliga, Jonathan T Wang, Daniel Ramage, Nada Amin, Benno Schwikowski, and Trey Ideker. 2003. "Cytoscape: a software environment for integrated models of biomolecular interaction networks." *Genome research* 13 (11):2498-2504.

Shen, Yanting, Zhengkui Zhou, Zheng Wang, Weiyu Li, Chao Fang, Mian Wu, Yanming Ma, Tengfei Liu, Ling-An Kong, and De-Liang Peng. 2014. "Global dissection of alternative splicing in paleopolyploid soybean." *The Plant Cell* 26 (3):996-1008.

Shikata, Hiromasa, Kousuke Hanada, Tomokazu Ushijima, Moeko Nakashima, Yutaka Suzuki, and Tomonao Matsushita. 2014. "Phytochrome controls alternative splicing to mediate light responses in Arabidopsis." *Proceedings of the National Academy of Sciences* 111 (52):18781-18786.

- Singh, Rajinder, Meilina Ong-Abdullah, Eng-Ti Leslie Low, Mohamad Arif Abdul Manaf, Rozana Rosli, Rajanaidu Nookiah, Leslie Cheng-Li Ooi, Siew-Eng Ooi, Kuang-Lim Chan, and Mohd Amin Halim. 2013. "Oil palm genome sequence reveals divergence of interfertile species in Old and New worlds." *Nature* 500 (7462):335-339.
- Staiger, Dorothee, and John WS Brown. 2013. "Alternative splicing at the intersection of biological timing, development, and stress responses." *The Plant Cell* 25 (10):3640-3656.
- Stamatakis, Alexandros. 2014. "RAxML version 8: a tool for phylogenetic analysis and post-analysis of large phylogenies." *Bioinformatics*:btu033.
- Streitner, Corinna, Craig G Simpson, Paul Shaw, Selahattin Danisman, John WS Brown, and Dorothee Staiger. 2013. "Small changes in ambient temperature affect alternative splicing in *Arabidopsis thaliana*." *Plant signaling & behavior* 8 (7):11240-55.
- Sturgill, David, John H Malone, Xia Sun, Harold E Smith, Leonard Rabinow, Marie-Laure Samson, and Brian Oliver. 2013. "Design of RNA splicing analysis null models for post hoc filtering of *Drosophila* head RNA-Seq data with the splicing analysis kit (Spanki)." *BMC bioinformatics* 14 (1):1.
- Su, Z. X., J. M. Wa, J. Yu, X. Q. Huang, and X. Gu. 2006. "Evolution of alternative splicing after gene duplication." *Genome Research* 16 (2):182-189. doi: 10.1101/gr.4197006.
- Su, Zhixi, and Xun Gu. 2012. "Revisit on the evolutionary relationship between alternative splicing and gene duplication." *Gene* 504 (1):102-106.
- Syed, Naeem H, Silvas J Prince, Raymond N Mutava, Gunvant Patil, Song Li, Wei Chen, Valliyodan Babu, Trupti Joshi, Saad Khan, and Henry T Nguyen.

2015. "Core clock, SUB1, and ABAR genes mediate flooding and drought responses via alternative splicing in soybean." *Journal of experimental botany* 66 (22):7129-7149.

Szklarczyk, Damian, Andrea Franceschini, Stefan Wyder, Kristoffer Forslund, Davide Heller, Jaime Huerta-Cepas, Milan Simonovic, Alexander Roth, Alberto Santos, and Kalliopi P Tsafou. 2014. "STRING v10: protein-protein interaction networks, integrated over the tree of life." *Nucleic acids research*:gku1003.

Tang, Ren-Jie, Fu-Geng Zhao, Veder J Garcia, Thomas J Kleist, Lei Yang, Hong-Xia Zhang, and Sheng Luan. 2015. "Tonoplast CBL-CIPK calcium signaling network regulates magnesium homeostasis in Arabidopsis." *Proceedings of the National Academy of Sciences* 112 (10):3134-3139.

Thatcher, Shawn R, Olga N Danilevskaya, Xin Meng, Mary Beatty, Gina Zastrow-Hayes, Charlotte Harris, Brandon Van Allen, Jeffrey Habben, and Bailin Li. 2016. "Genome-Wide Analysis of Alternative Splicing during Development and Drought Stress in Maize." *Plant Physiology* 170 (1):586-599.

Thatcher, Shawn R, Wengang Zhou, April Leonard, Bing-Bing Wang, Mary Beatty, Gina Zastrow-Hayes, Xiangyu Zhao, Andy Baumgarten, and Bailin Li. 2014. "Genome-wide analysis of alternative splicing in Zea mays: landscape and genetic regulation." *The Plant Cell* 26 (9):3472-3487.

Trapnell, Cole, Adam Roberts, Loyal Goff, Geo Pertea, Daehwan Kim, David R. Kelley, Harold Pimentel, Steven L. Salzberg, John L. Rinn, and Lior Pachter. 2012. "Differential gene and transcript expression analysis of RNA-seq experiments with TopHat and Cufflinks." *Nature Protocols* 7 (3):562-578. doi: 10.1038/nprot.2012.016.

- Vogel, John P, David F Garvin, Todd C Mockler, Jeremy Schmutz, Dan Rokhsar, Michael W Bevan, Kerrie Barry, Susan Lucas, Miranda Harmon-Smith, and Kathleen Lail. 2010. "Genome sequencing and analysis of the model grass *Brachypodium distachyon*." *Nature* 463 (7282):763-768.
- Walley, Justin W, Ryan C Sartor, Zhouxin Shen, Robert J Schmitz, Kevin J Wu, Mark A Urich, Joseph R Nery, Laurie G Smith, James C Schnable, and Joseph R Ecker. 2016. "Integration of omic networks in a developmental atlas of maize." *Science* 353 (6301):814-818.
- Walters, Braden, Gengkon Lum, Gaurav Sablok, and Xiang Jia Min. 2013. "Genome-wide landscape of alternative splicing events in *Brachypodium distachyon*." *DNA research* 20 (2):163-171.
- Wang, Dapeng, Yubin Zhang, Zhang Zhang, Jiang Zhu, and Jun Yu. 2010. "KaKs\_Calculator 2.0: a toolkit incorporating gamma-series methods and sliding window strategies." *Genomics, Proteomics & Bioinformatics* 8 (1):77-80.
- Wang, Zefeng, and Christopher B Burge. 2008. "Splicing regulation: from a parts list of regulatory elements to an integrated splicing code." *Rna* 14 (5):802-813.
- Wu, Hshin-Ping, YS Su, Hsiu-Chen Chen, Yu-Rong Chen, Chia-Chen Wu, Wen-Dar Lin, and Shih-Long Tu. 2014. "Genome-wide analysis of light-regulated alternative splicing mediated by photoreceptors in *Physcomitrella patens*." *Genome Biol* 15 (1):R10.
- Xing, Y., and C. Lee. 2005. "Evidence of functional selection pressure for alternative splicing events that accelerate evolution of protein subsequences." *Proceedings of the National Academy of Sciences of the*

*United States of America* 102 (38):13526-13531. doi:

10.1073/pnas.0501313102.

- Xing, Yi, and Christopher Lee. 2006. "Alternative splicing and RNA selection pressure—evolutionary consequences for eukaryotic genomes." *Nature Reviews Genetics* 7 (7):499-509.
- Xu, Peng, Yimeng Kong, Dongliang Song, Cheng Huang, Xuan Li, and Laigeng Li. 2014. "Conservation and functional influence of alternative splicing in wood formation of *Populus* and *Eucalyptus*." *BMC genomics* 15 (1):780.
- Zhang, Runxuan, Cristiane PG Calixto, Nikoleta A Tzioutziou, Allan B James, Craig G Simpson, Wenbin Guo, Yamile Marquez, Maria Kalyna, Rob Patro, and Eduardo Eyra. 2015. "AtRTD—a comprehensive reference transcript dataset resource for accurate quantification of transcript-specific expression in *Arabidopsis thaliana*." *New Phytologist* 208 (1):96-101.
- Zhao, Lei, Ning Zhang, Peng-Fei Ma, Qi Liu, De-Zhu Li, and Zhen-Hua Guo. 2013. "Phylogenomic analyses of nuclear genes reveal the evolutionary relationships within the BEP clade and the evidence of positive selection in Poaceae." *PloS one* 8 (5):e64642.

**Table 1. Conserved alternative splicing across 9 species at the gene family level.**

Percentage is based on total number of conserved alternative splicing clusters.

| Number of species | AltA       | AltD       | ATE     | ExonS   | IntronR    | Total/%    |
|-------------------|------------|------------|---------|---------|------------|------------|
| 2                 | 1,384      | 684        | 201     | 335     | 4,128      | 6,732/68.7 |
| 3                 | 447        | 181        | 32      | 69      | 1,099      | 1828/18.6  |
| 4                 | 218        | 112        | 6       | 26      | 351        | 713/7.3    |
| 5                 | 117        | 36         | 2       | 21      | 109        | 285/2.9    |
| 6                 | 58         | 29         | 0       | 10      | 52         | 149/1.5    |
| 7                 | 22         | 12         | 0       | 3       | 32         | 69/0.7     |
| 8                 | 7          | 3          | 0       | 4       | 7          | 21/0.2     |
| 9                 | 2          | 2          | 0       | 1       | 2          | 7/0.1      |
| Total/%           | 2,255/23.0 | 1,059/10.8 | 241/2.5 | 469/4.8 | 5,780/59.0 | 9,804      |



**Table 2. Conserved alternative splicing clusters among different species and clades.**

\* Conserved at least one species in PCAMAD clade and one species in BEP clade.

|                                                                                           | Total | IntronR | AltA | AltD | ExonS | ATE |
|-------------------------------------------------------------------------------------------|-------|---------|------|------|-------|-----|
| Conserved between <i>Amborella</i> and other species                                      | 1,816 | 1,015   | 450  | 205  | 114   | 32  |
| Conserved in <i>Amborella</i> , <i>Arabidopsis</i> , and at least one species of Monocots | 129   | 64      | 43   | 11   | 10    | 1   |
| Conserved between <i>Amborella</i> and <i>Arabidopsis</i> not in Monocots                 | 80    | 34      | 31   | 11   | 4     | 0   |
| Conserved across <i>Amborella</i> and seven Monocot not in <i>Arabidopsis</i>             | 9     | 2       | 3    | 2    | 2     | 0   |
| Conserved in banana, African oil plum and at least one grass species                      | 239   | 162     | 44   | 20   | 11    | 2   |
| Conserved across five species in grass                                                    | 224   | 60      | 106  | 37   | 21    | 0   |
| Conserved across seven species in monocots                                                | 34    | 13      | 12   | 5    | 4     | 0   |
| Conserved between PACMAD and BEP clades*                                                  | 4333  | 2548    | 1052 | 480  | 177   | 76  |

**Table 3. A comparison of intron length in the conserved intron retention events vs. non-conserved intron retention events across the species examined.** (NS, Not significant; \*, P < 0.05; \*\*\*, P < 0.001)

|                              | <i>Amborella</i> | <i>Arabidopsis</i> | Banana | <i>Brachypodium</i> | Foxtail millet | Maize | Oil Palm | Rice | Sorghum |
|------------------------------|------------------|--------------------|--------|---------------------|----------------|-------|----------|------|---------|
| Conserved AS                 |                  |                    |        |                     |                |       |          |      |         |
| Mean                         | 670              | 165                | 329    | 411                 | 402            | 440   | 315      | 417  | 409     |
| Median                       | 390              | 96                 | 143    | 233                 | 237            | 207   | 131      | 269  | 256     |
| No evidence for conserved AS |                  |                    |        |                     |                |       |          |      |         |
| Mean                         | 651              | 186                | 327    | 474                 | 410            | 471   | 287      | 486  | 437     |
| Median                       | 316              | 113                | 131    | 245                 | 201            | 205   | 121      | 247  | 242     |
| Wilcoxon test                |                  |                    |        |                     |                |       |          |      |         |
| P value                      | ***              | ***                | NS     | ***                 | *              | NS    | *        | NS   | NS      |

## **Figure Legends**

### **Figure 1. Pipeline to identify conserved alternative splicing events.**

Up to 300bp on either side of a splice junction were extracted. These extracted sequences were binned together with all other similarly extracted and binned sequences flanking the same type of event for each species (eg. one bin with sequences flanking junctions involved in intron retention, one bin with sequences flanking junctions involved in exon skipping, etc.). Sequences within each bin were compared with tBLASTx to bins of the same event from other species to identify similar tags. Cases where the sequence tags were similar and the parent genes are from different species but represent orthologs as evidenced by being within the same orthogroup (see Methods) defined conserved alternative splicing events.

### **Figure 2. Genes with conserved alternative splicing events across nine species.**

We calculate the number of genes with conserved alternative splicing events in each species. Tetraploidy and Hexaploidy are labeled on the phylogenetic trees. The length of the phylogenetic tree is not proportional to the phylogenetic distance.

### **Figure 3. Alternative splicing and conserved alternative splicing enriched across grass syntenic genes.**

We calculated the percentage of AS in syntenic and non-syntenic genes (the percentage of AS genes are labeled in blue). In addition, we calculated the

percentage of conserved AS in syntenic AS genes and non-syntenic AS genes (the percentage of conserved AS genes are labeled in black).

**Figure 4. Violin plot of Ka/Ks value from flanking upstream and downstream in different alternative splicing events across syntenic genes within grass species.**

We calculated the pairwise Ka/Ks ratio within exonic regions upstream and downstream of conserved alternative splicing events in five grass species. Only those exonic regions aligned at  $a \geq 120$ bp were considered in Ka/Ks calculation. The dotted lines within the violin plot represented the first, second and third quartile.

**Figure 5. Phylogenetic tree and gene structure of SR, RS and RS2Z subfamilies in maize and sorghum.**

A) Phylogenetic tree representing the relationship of genes from SR and RS subfamilies in maize and sorghum; associated gene structures are illustrated by Fancygene to the right. Constitutive exons are shaded blue and alternative region are indicated with orange. Transcript structure is indicated by exons connected via dashed lines; orthologous exons are indicated with grey lines. B) Phylogenetic tree and gene structure of RS2Z subfamily in maize and sorghum are illustrated by Fancygene. Annotation and shading is described above; intron retention regions are indicated in clear boxes.

**Figure 6. Protein-protein network of *Arabidopsis* genes with evidence of conserved alternative splicing with *Amborella* and at least one species of monocot.**

The arrow in the network indicates the direction of the protein-protein network.

**Figure 7. Sequence conservation within a gene encoding an RNA-binding KH domain-containing protein that produces an exon skipping even conserved across species.**

An example of sequence conservation of the alternative exons in a RNA-binding KH domain-containing protein. The exon skipping in *Arabidopsis* is not included in the Araport11, but detected in AtRTD. Vista plots of pair-wise alignments between the RNA-binding KH domain protein encoding gene from *Brachypodium* and its orthologue in *Amborella*, *Arabidopsis*, banana, African oil palm, rice, foxtail millet, sorghum and maize. The alternative exon (boxed in red) is highly conserved between *Brachypodium* and its orthologues in eight other plant species. Levels of sequence identity between *Brachypodium* and its orthologues in eight other plants species displayed are depicted as blue peaks. Pink bars signify segments that pass the alignment criteria of 70% identity over 100bp window.

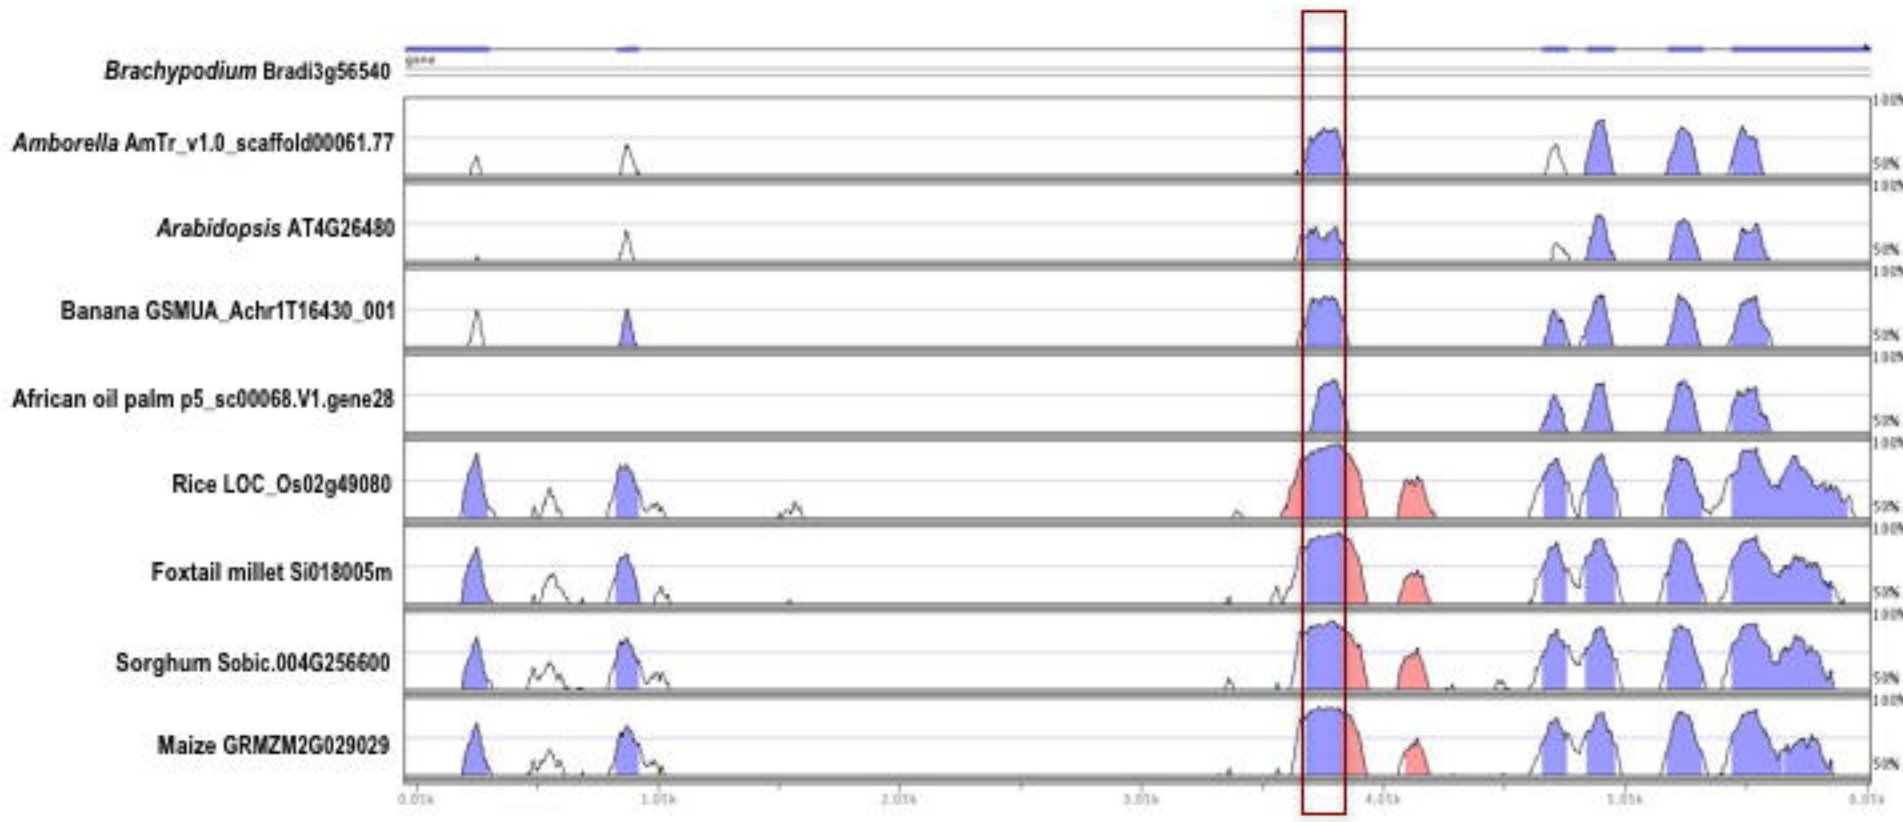

■ AS   ■ Non-AS   ■ Conserved AS   ■ Non-Conserved AS

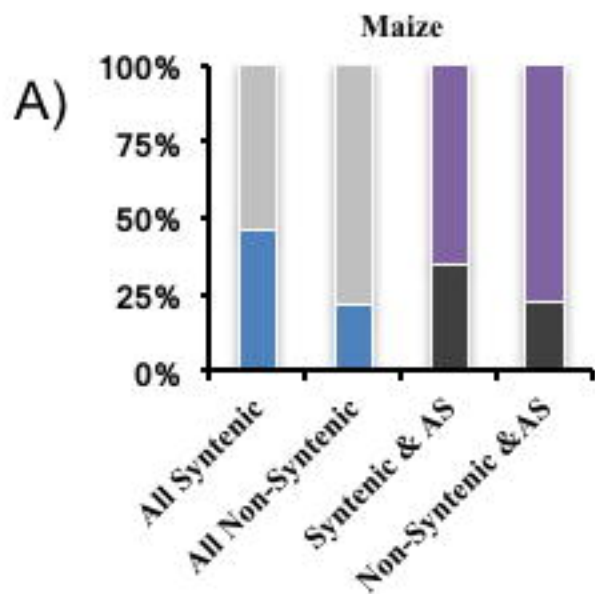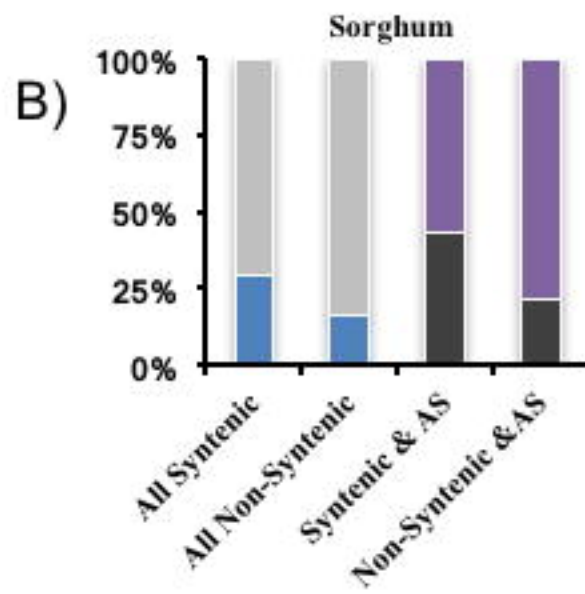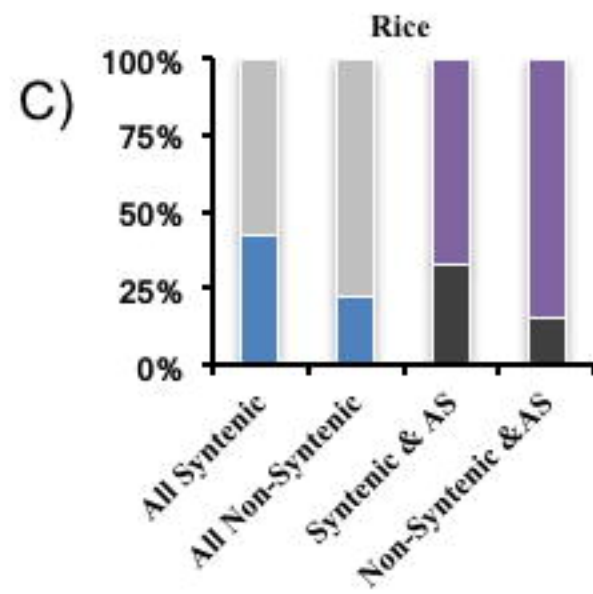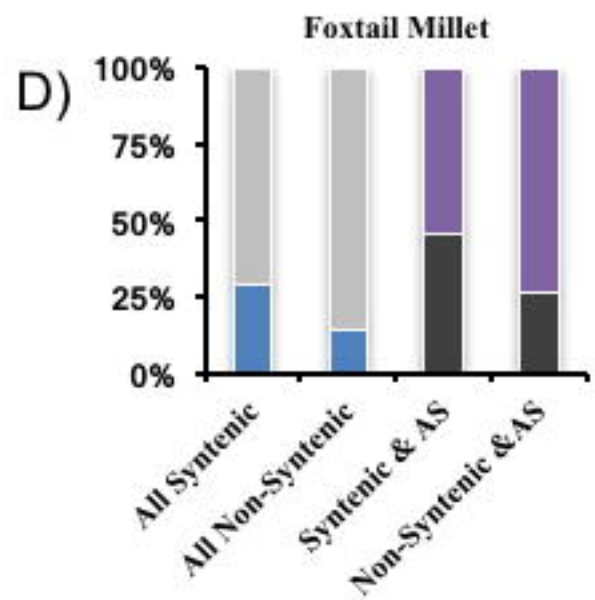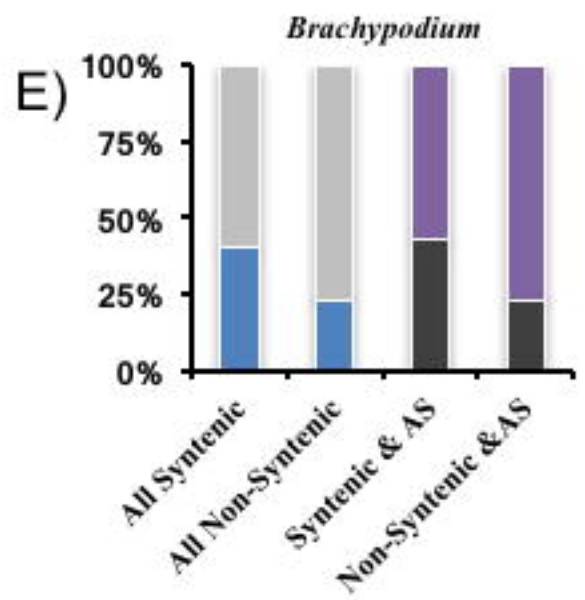

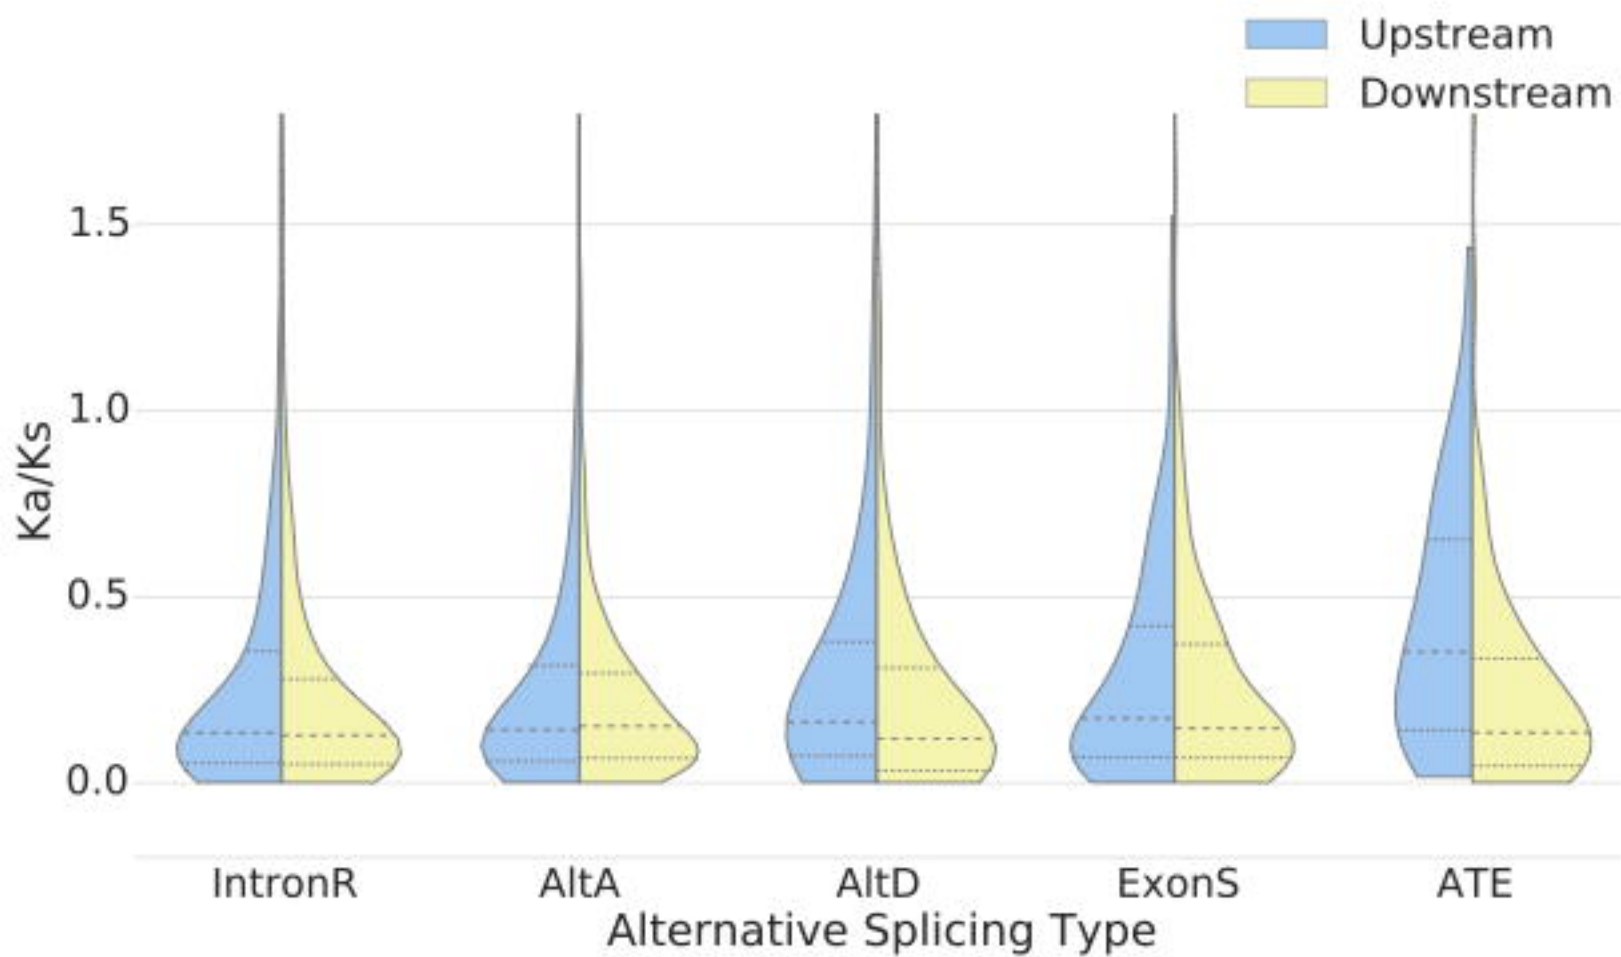



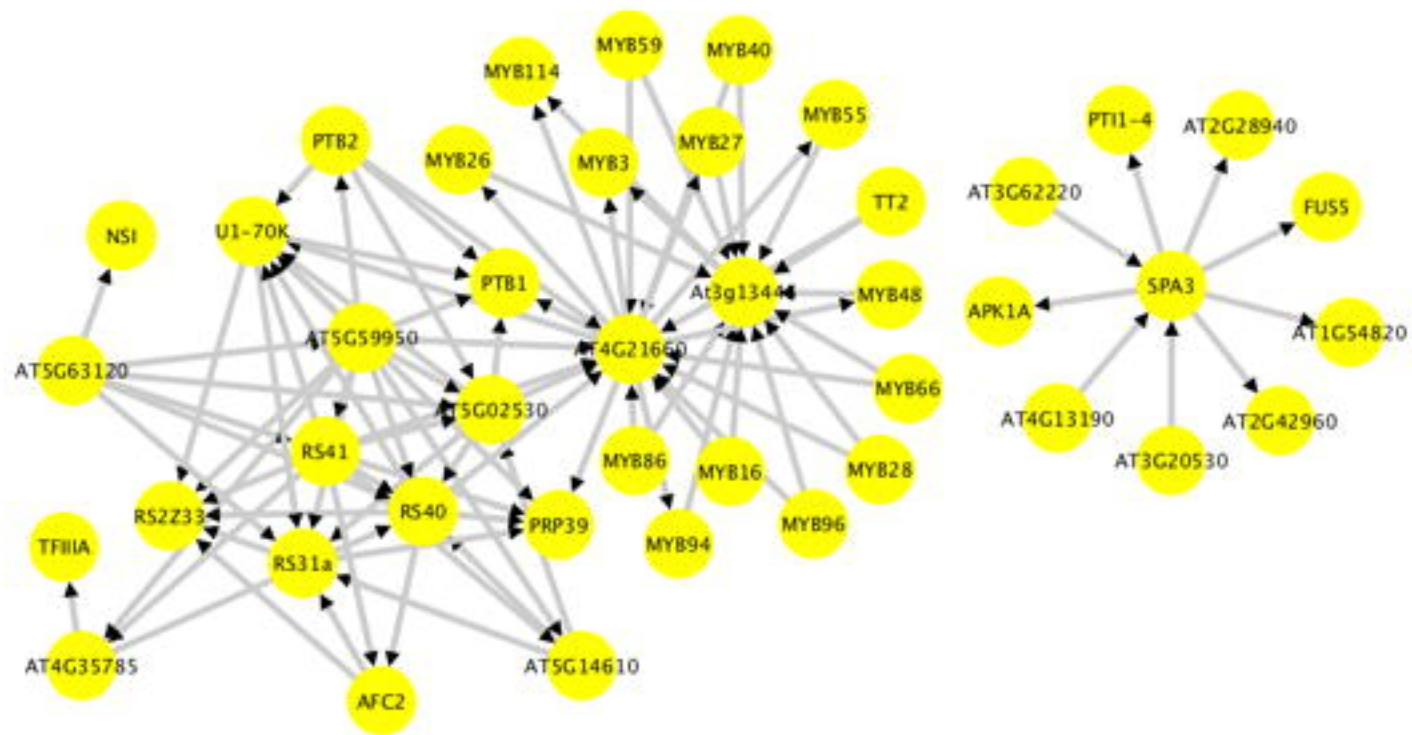

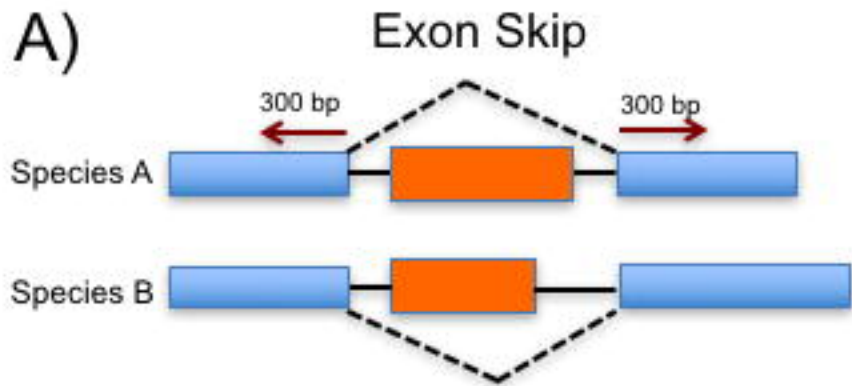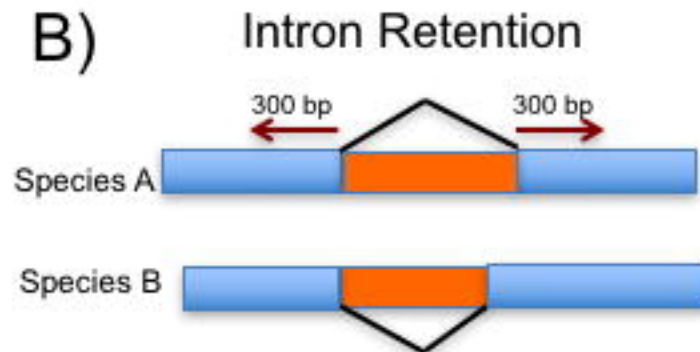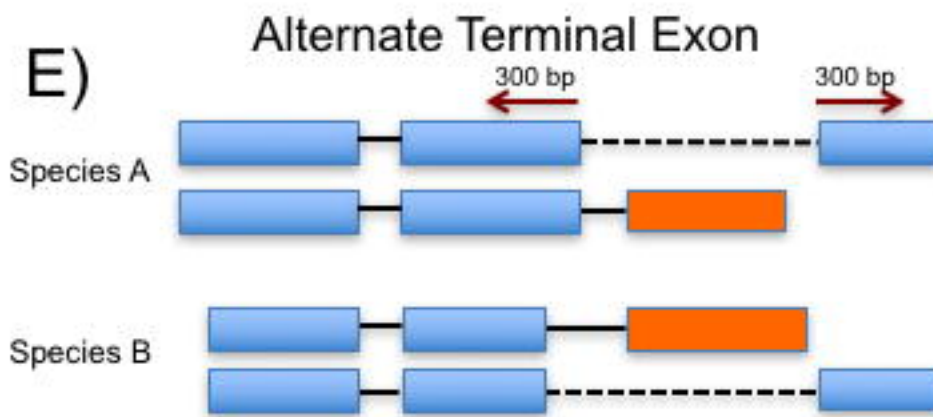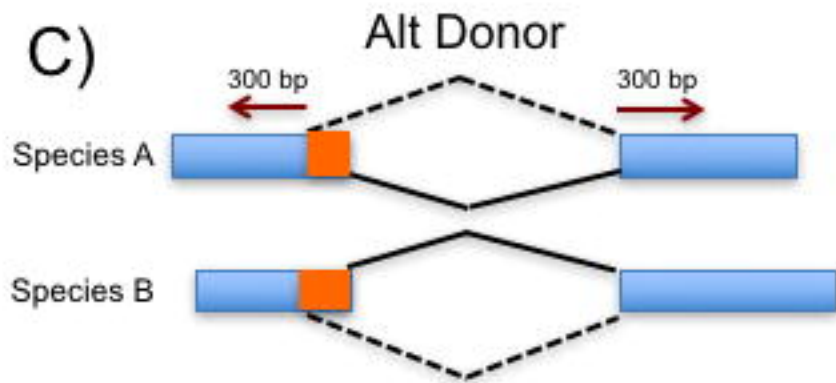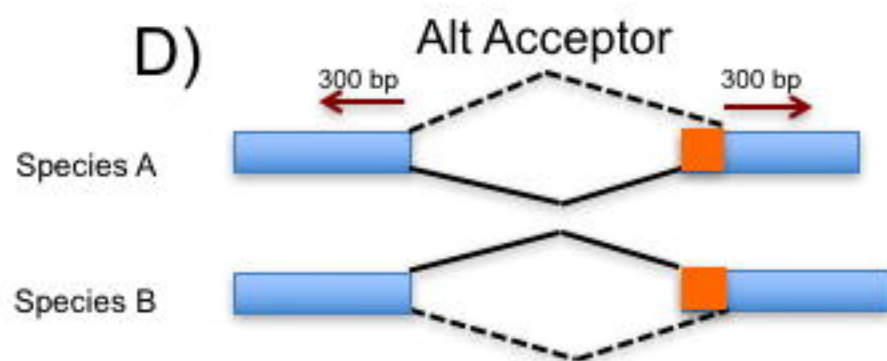

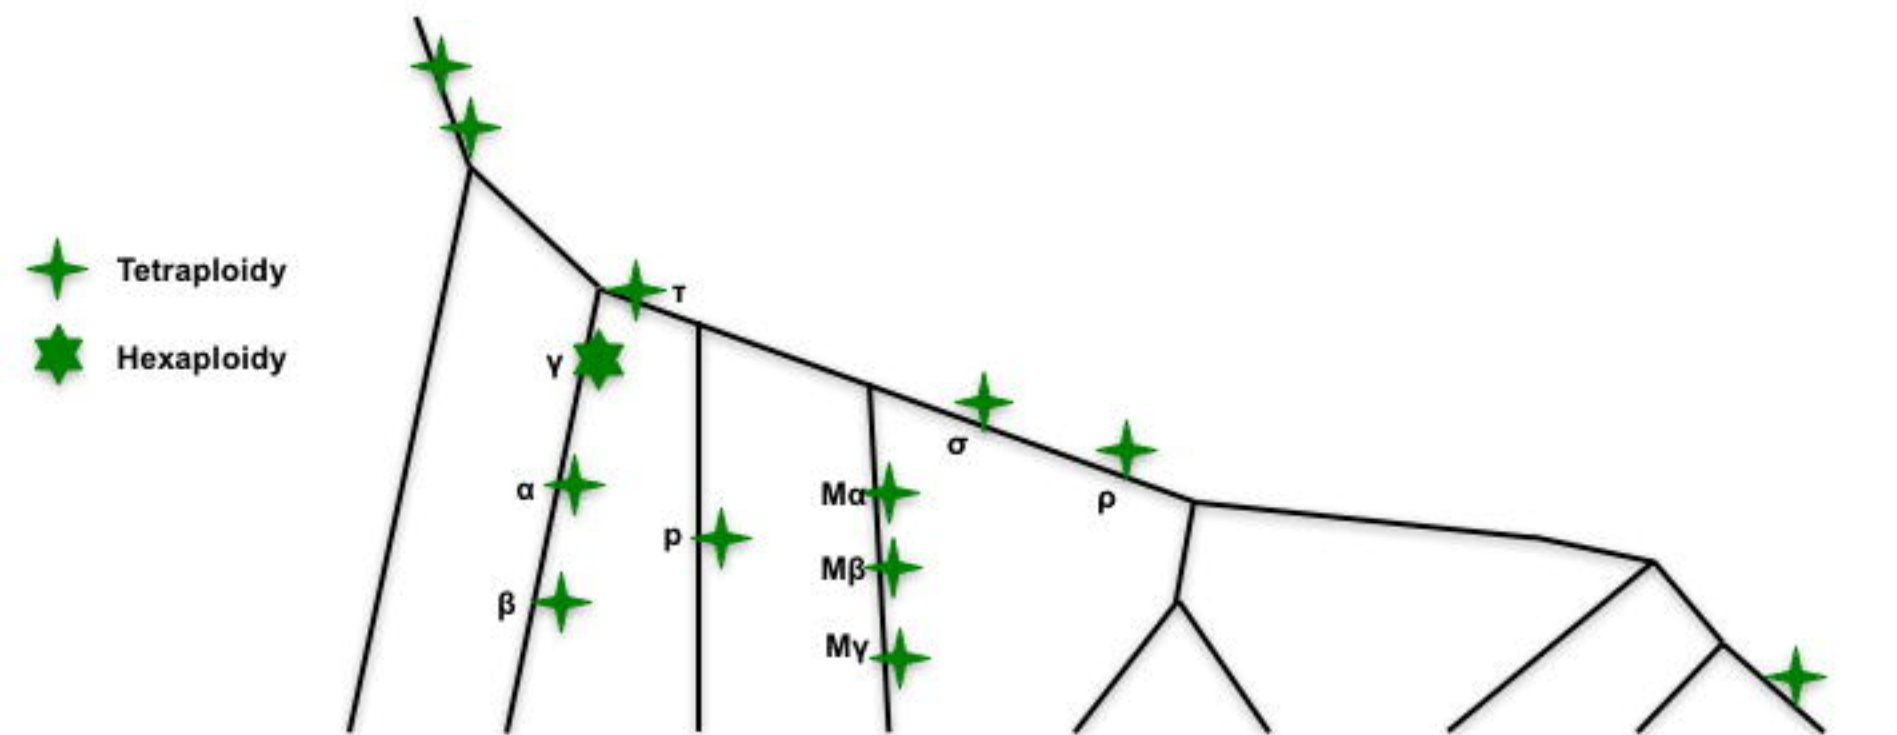

| AS type   | Total  | Amborella gene counts | Arabidopsis gene counts | African oil palm gene counts | Banana gene counts | Rice gene counts | Brachypodium gene counts | Foxtail mille gene counts | Sorghum gene counts | Maize gene counts |
|-----------|--------|-----------------------|-------------------------|------------------------------|--------------------|------------------|--------------------------|---------------------------|---------------------|-------------------|
| AltA      | 6,152  | 444                   | 222                     | 197                          | 409                | 867              | 931                      | 1051                      | 985                 | 1046              |
| AltD      | 2,925  | 207                   | 105                     | 72                           | 187                | 427              | 414                      | 473                       | 491                 | 549               |
| AltTE     | 539    | 32                    | 13                      | 30                           | 44                 | 64               | 71                       | 73                        | 116                 | 96                |
| ExonS     | 1,249  | 116                   | 43                      | 68                           | 113                | 180              | 173                      | 163                       | 201                 | 192               |
| IntronR   | 12,071 | 863                   | 675                     | 1019                         | 974                | 1591             | 2238                     | 1218                      | 897                 | 2596              |
| Total (%) | 19,235 | 1413 (18.3)           | 944 (12.0)              | 1269 (20.9)                  | 1565 (17.4)        | 2579 (23.1)      | 3102 (33.2)              | 2440 (36.2)               | 2236 (32.7)         | 3687 (25.7)       |

A)

SR

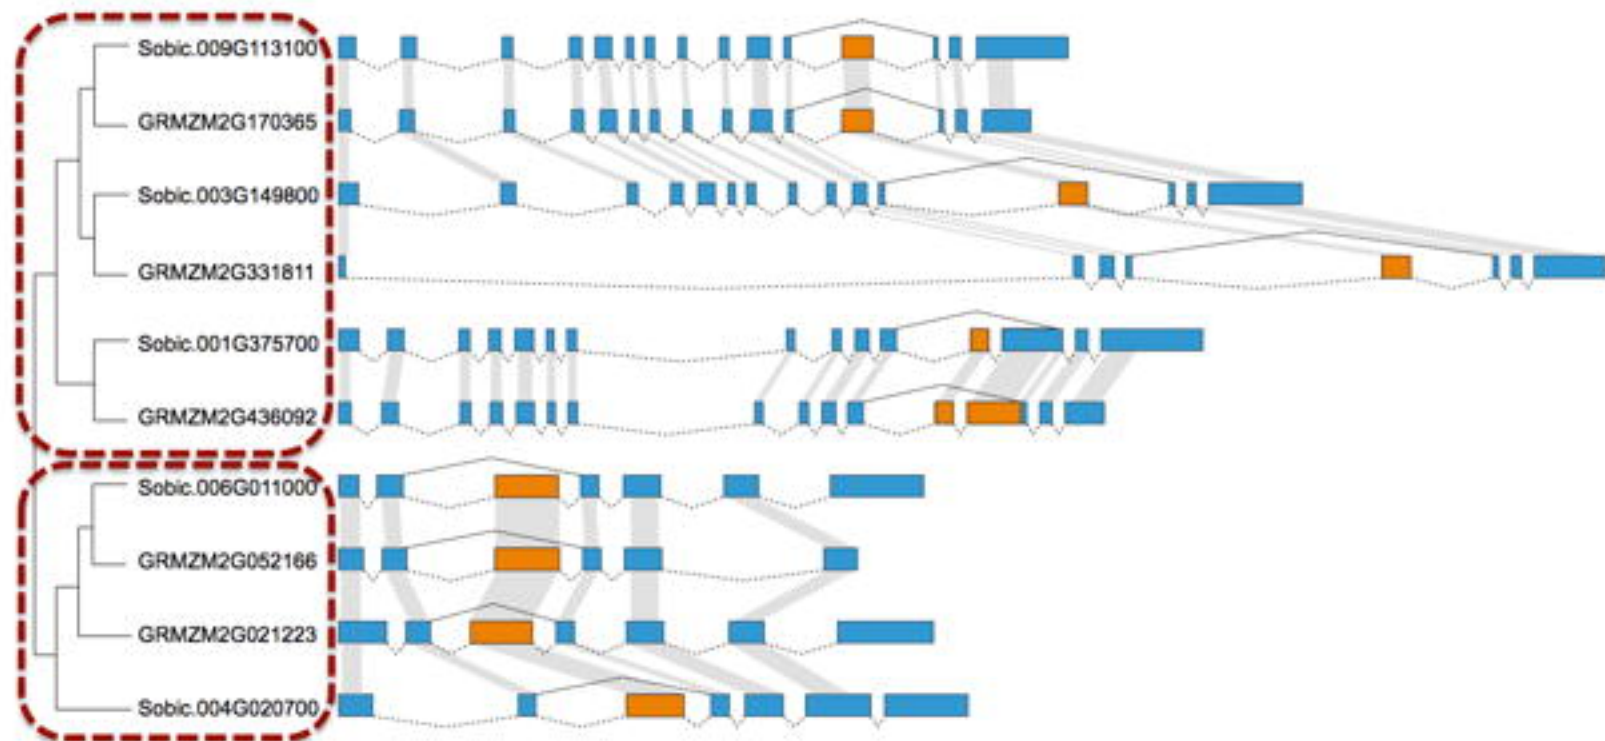

B)

RS2Z

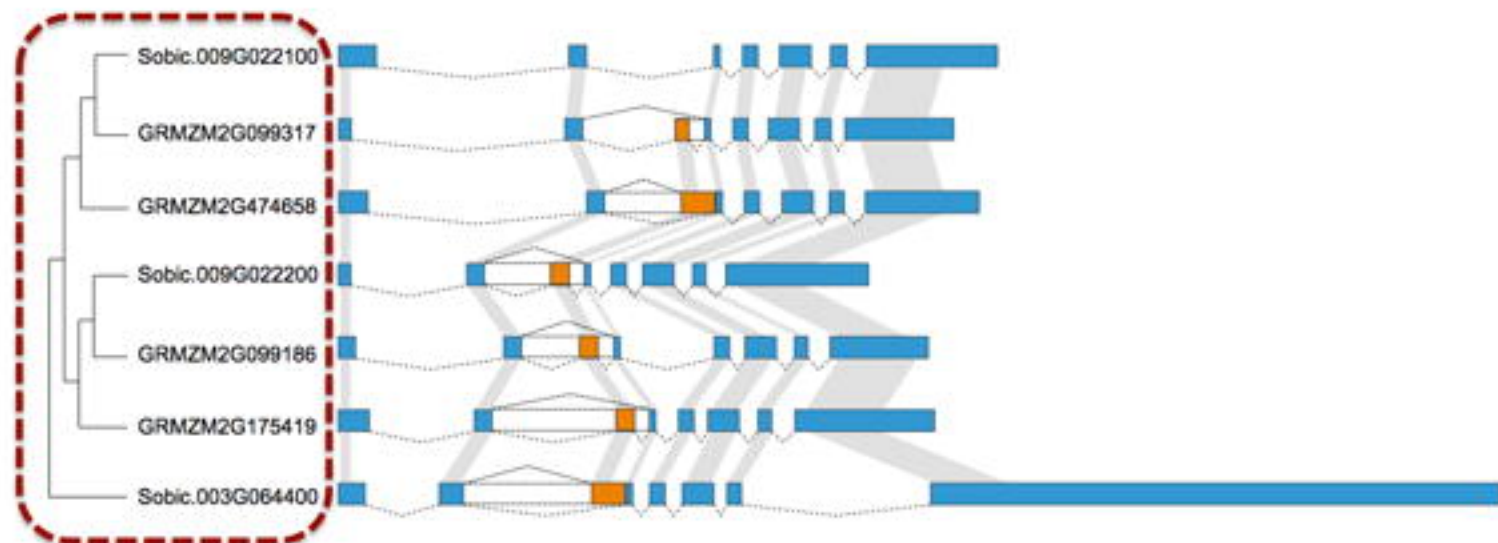

Source: http://www.biorxiv.org/content/10.1101/120469v1.full.pdf
